# Supplementary material
Source: publisher figshare collection journal article supplement (https://acs.figshare.com/ndownloader/files/3864001)

# Supporting Information for

## **Palladium-Catalyzed Aromatic C-H Bond Nitration Using Removable Directing Groups: Regiospecific Synthesis of Substituted *o*-Nitrophenols from Related Phenols**

Wei Zhang, Jian Zhang, Shaobo Ren, and Yunkui Liu\*

State Key Laboratory Breeding Base of Green Chemistry-Synthesis Technology, College of  
Chemical Engineering, Zhejiang University of Technology, Hangzhou 310014, P. R. Chin  
Email: ykuiliu@zjut.edu.cn

### **Contents**

|                                                                                                     |          |
|-----------------------------------------------------------------------------------------------------|----------|
| 1. NMR Spectra of <b>2a–2x</b>                                                                      | S2– S25  |
| 2. NMR Spectra of <b>3a–3u</b>                                                                      | S16– S37 |
| 3. <sup>1</sup> H NMR Spectrum of <b>1a-d<sub>5</sub></b>                                           | S38      |
| 4. <sup>1</sup> H NMR Spectrum of <b>2a</b> and <b>2a-d<sub>4</sub></b> Mixture for KIE Calculation | S38      |

# 1. NMR Spectra of 2a-2x

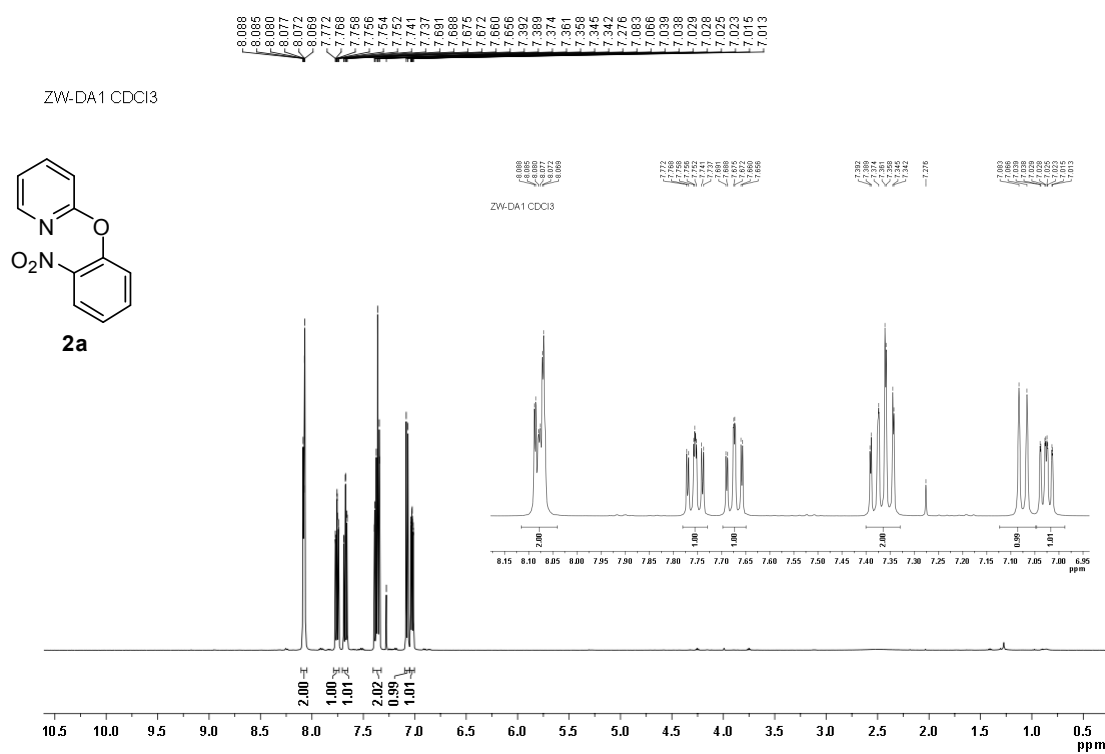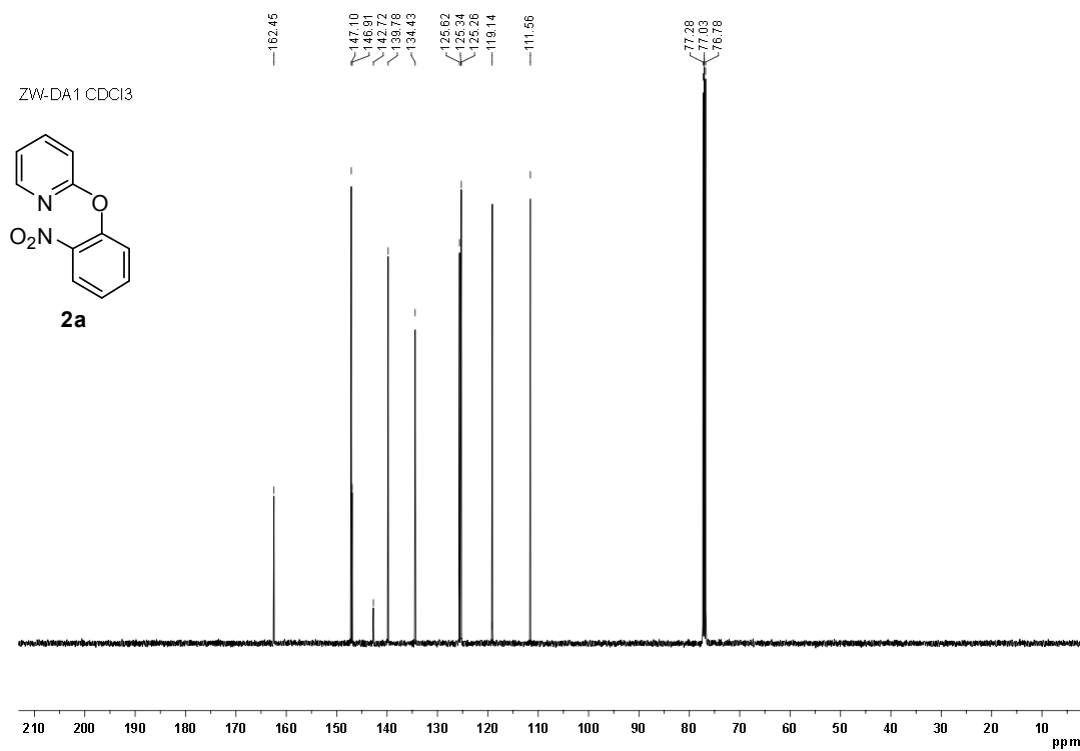

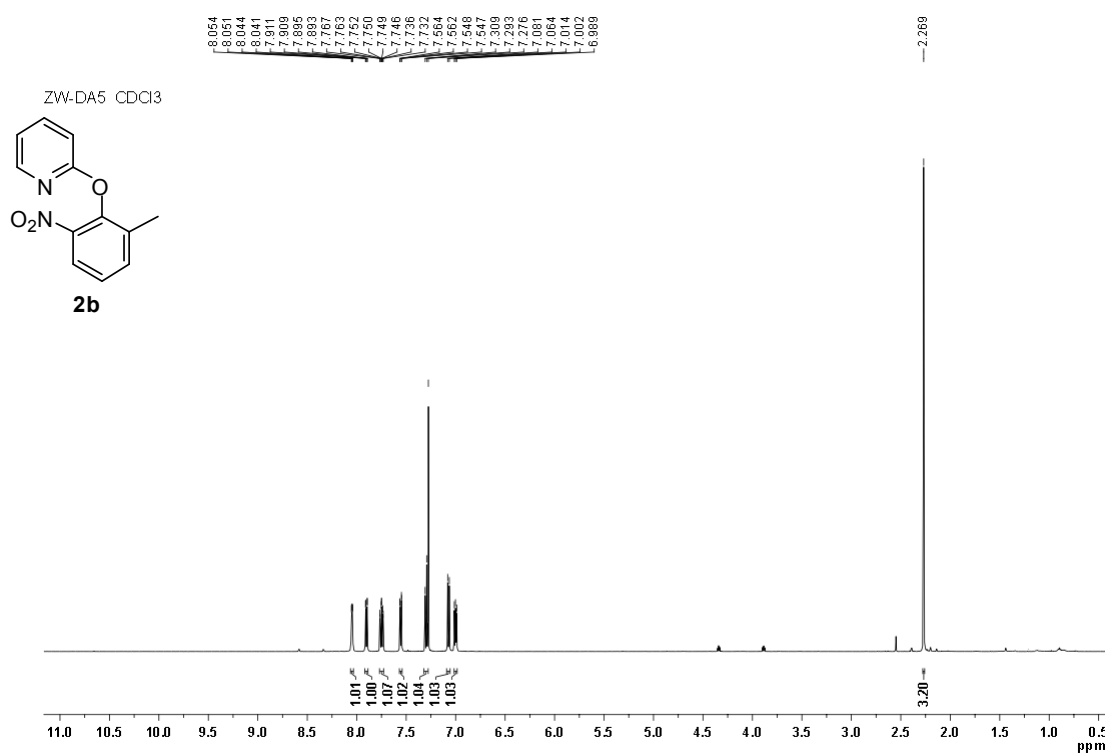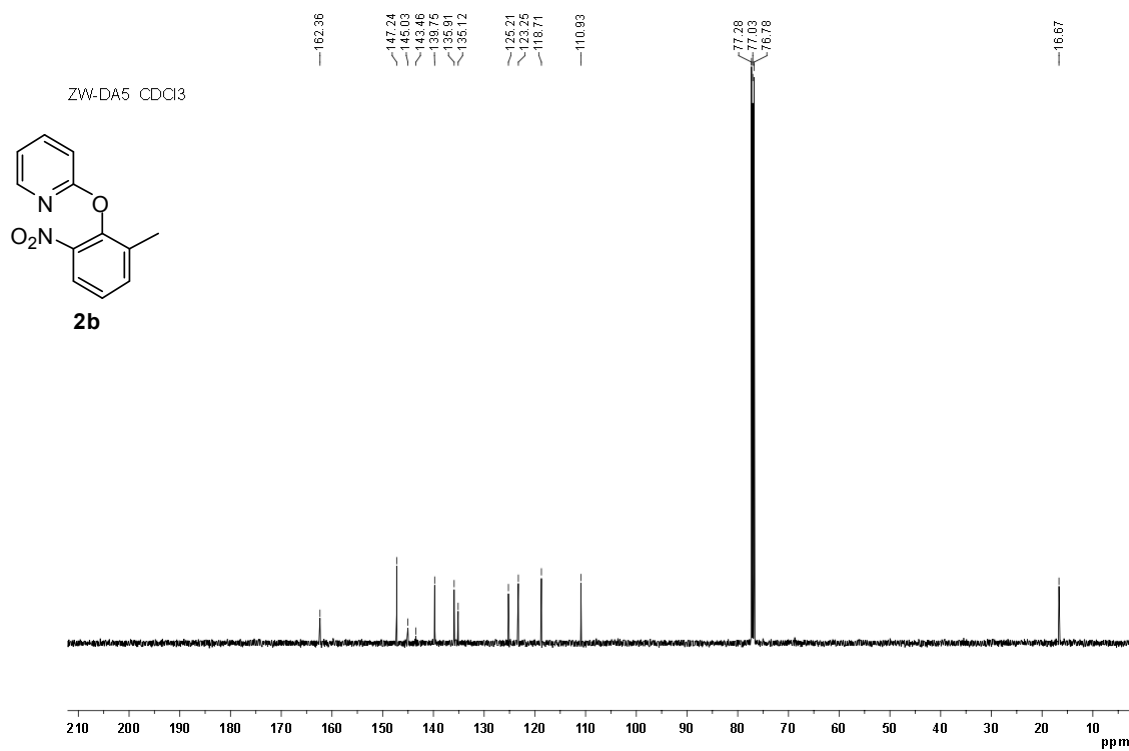

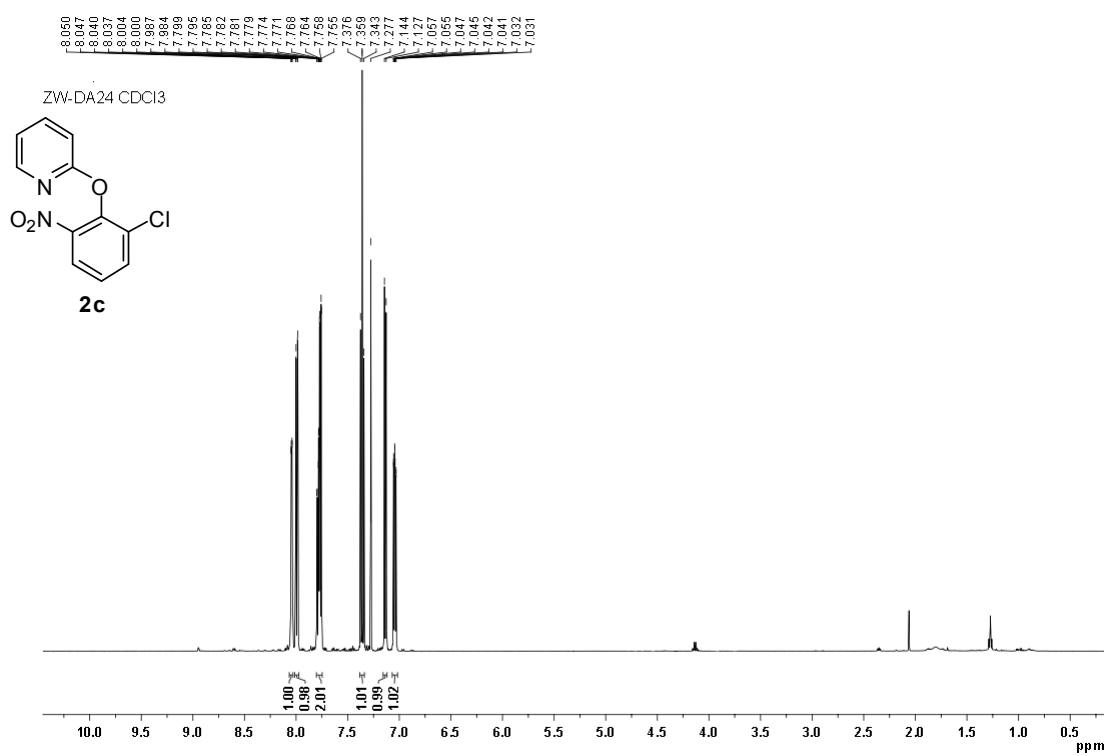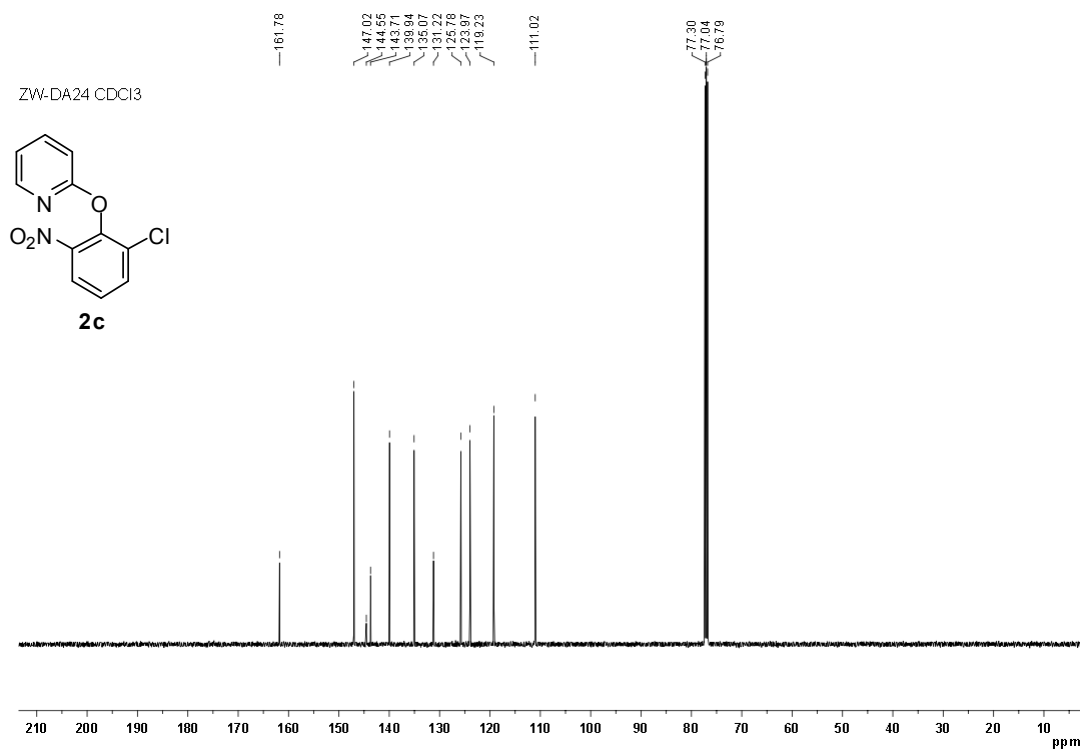

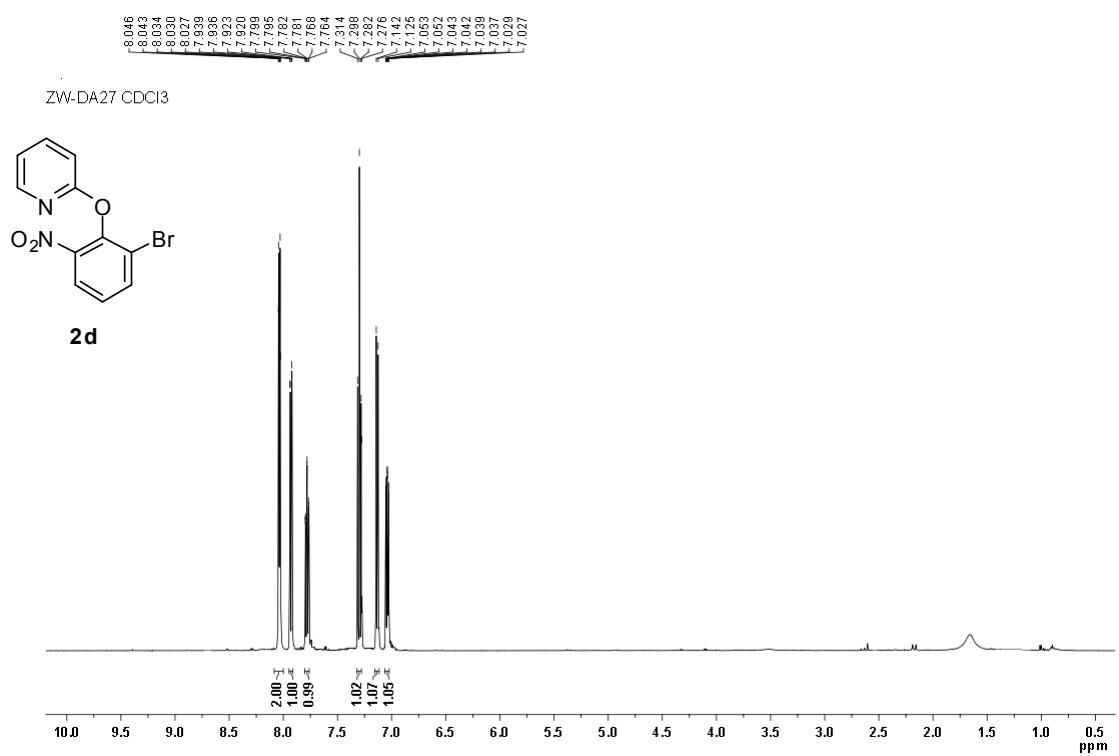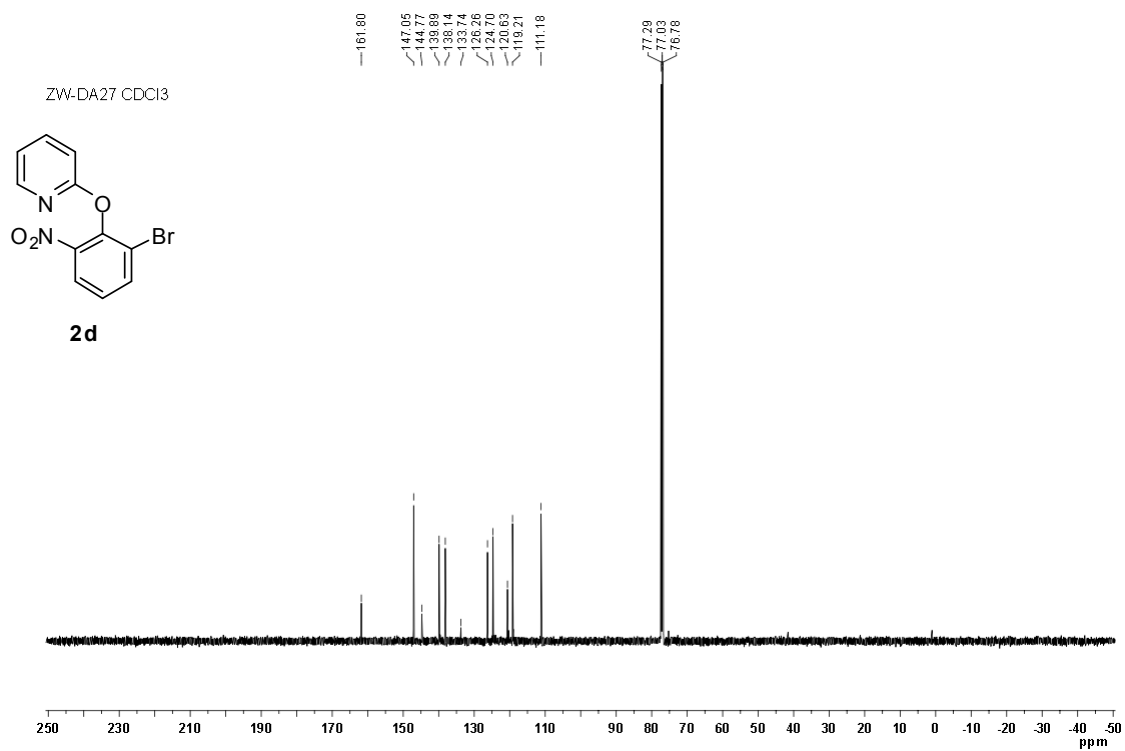

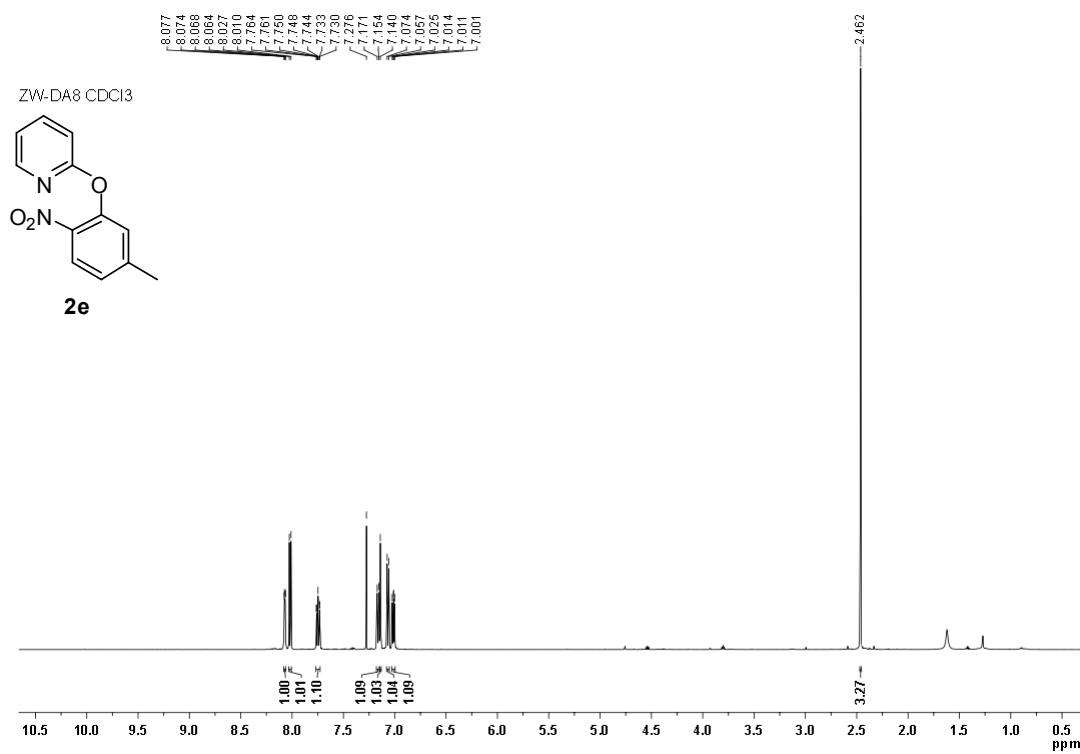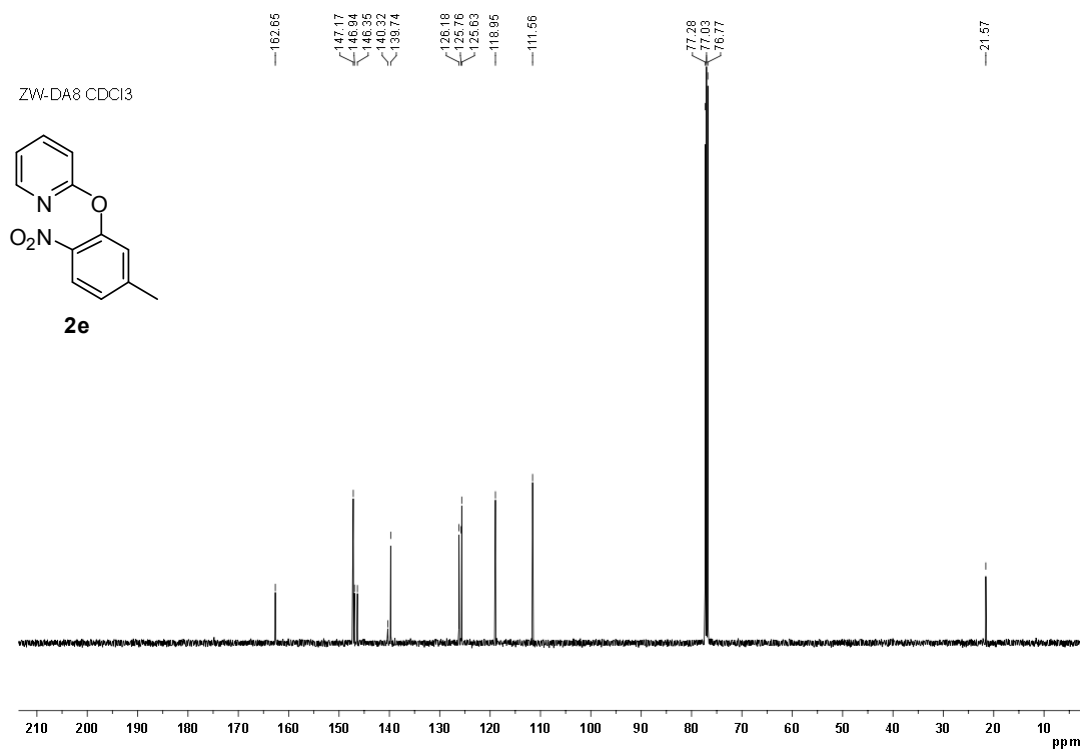

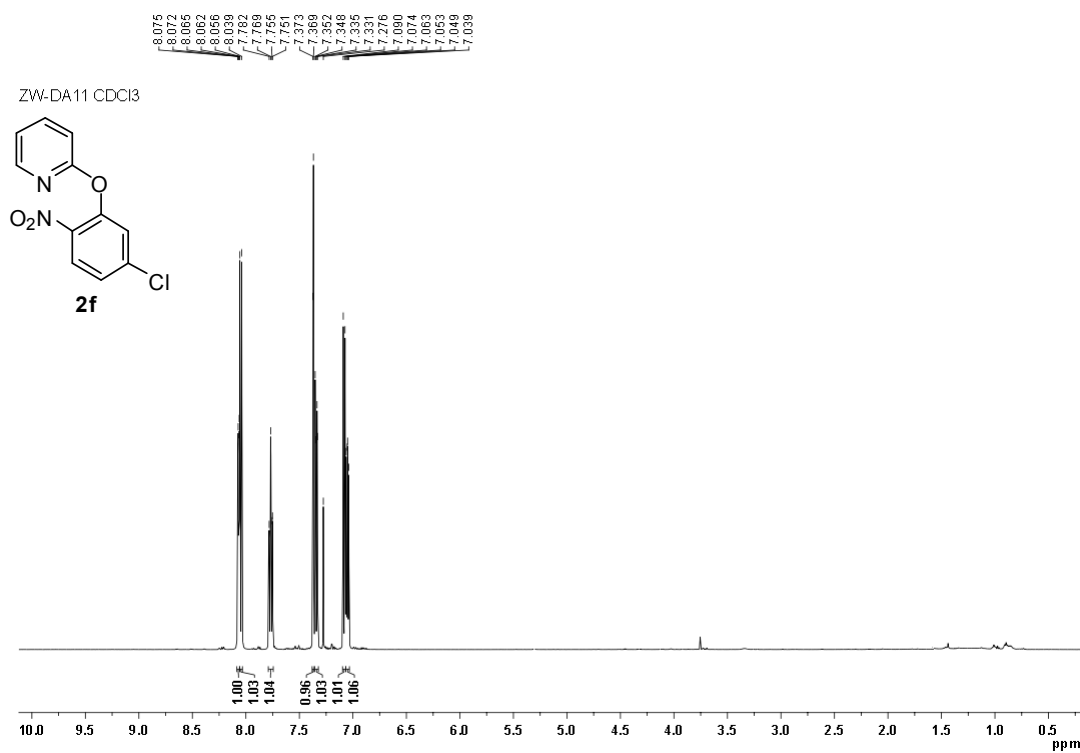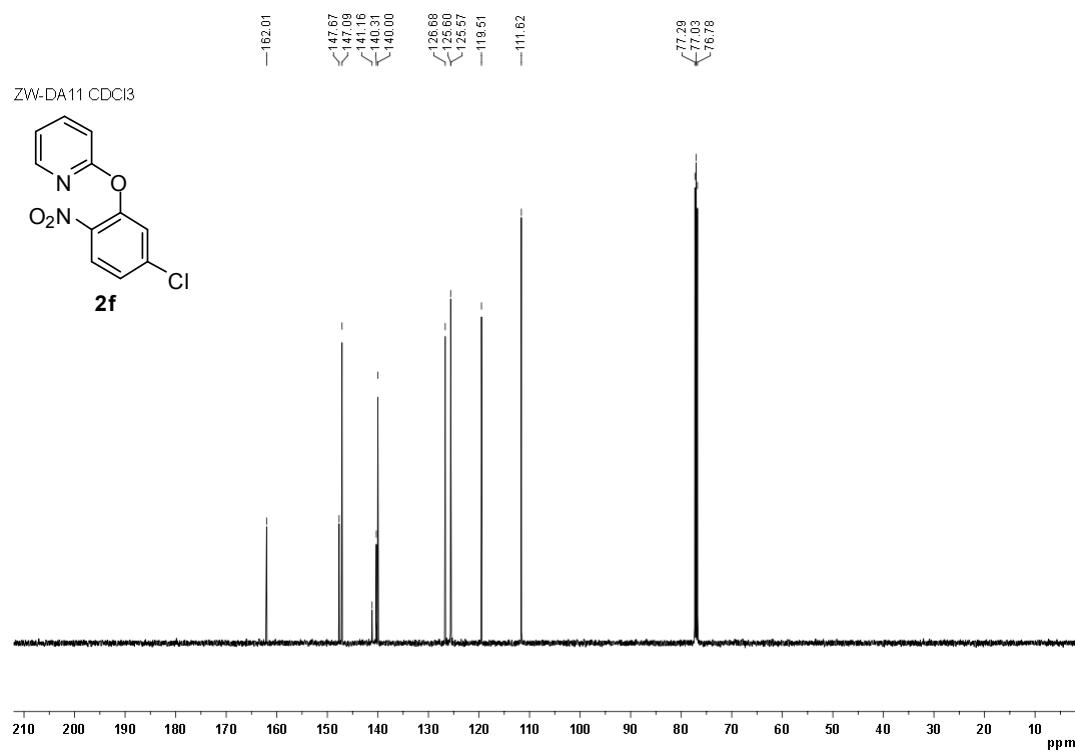

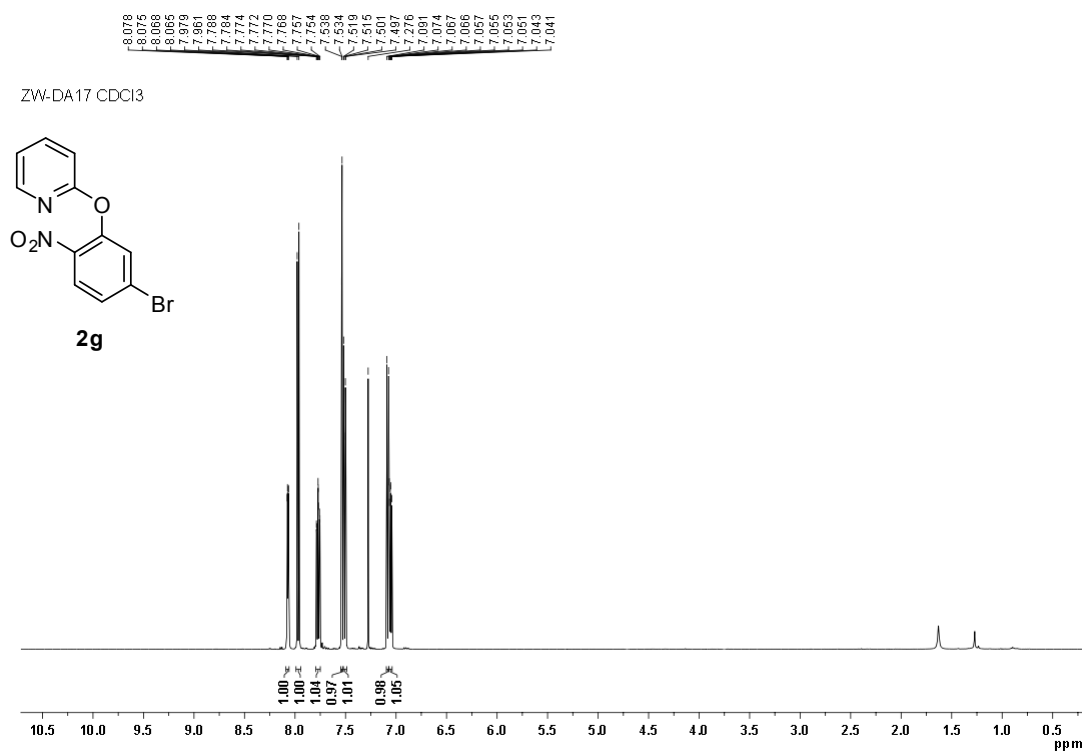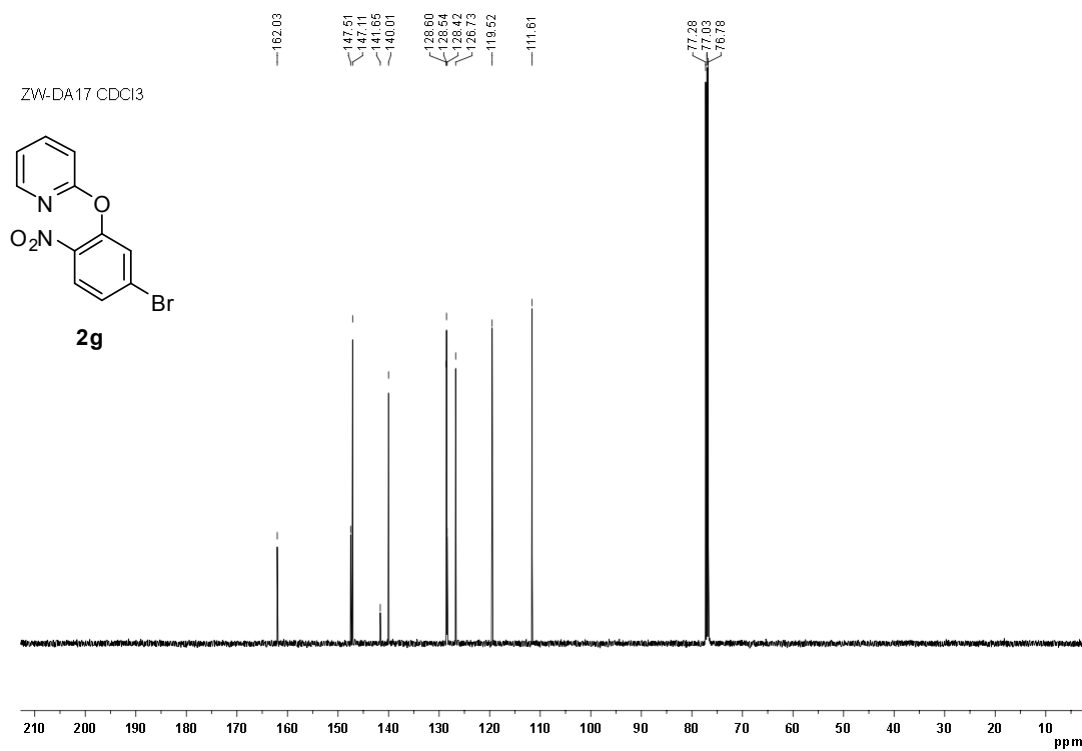



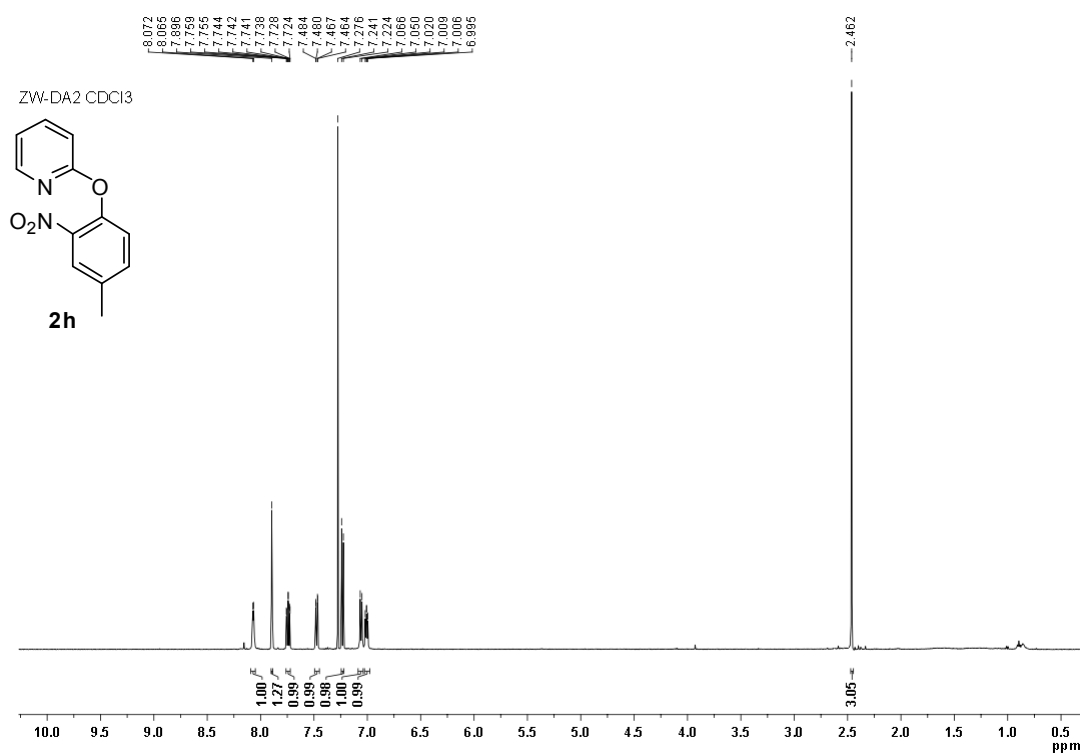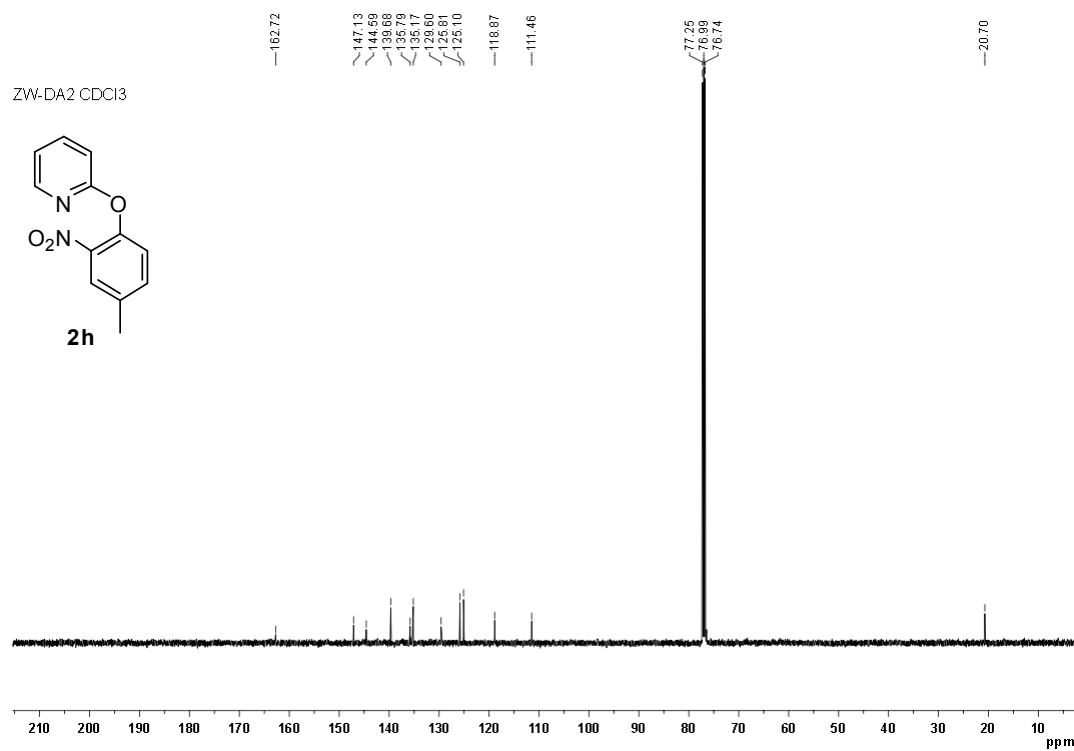



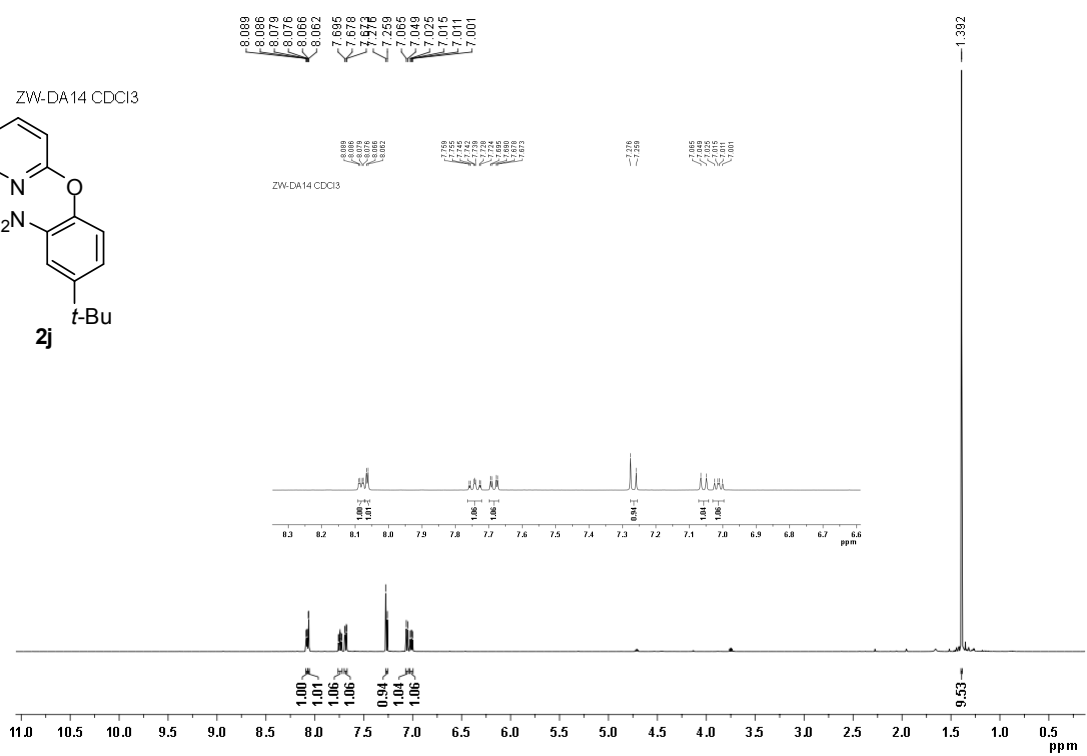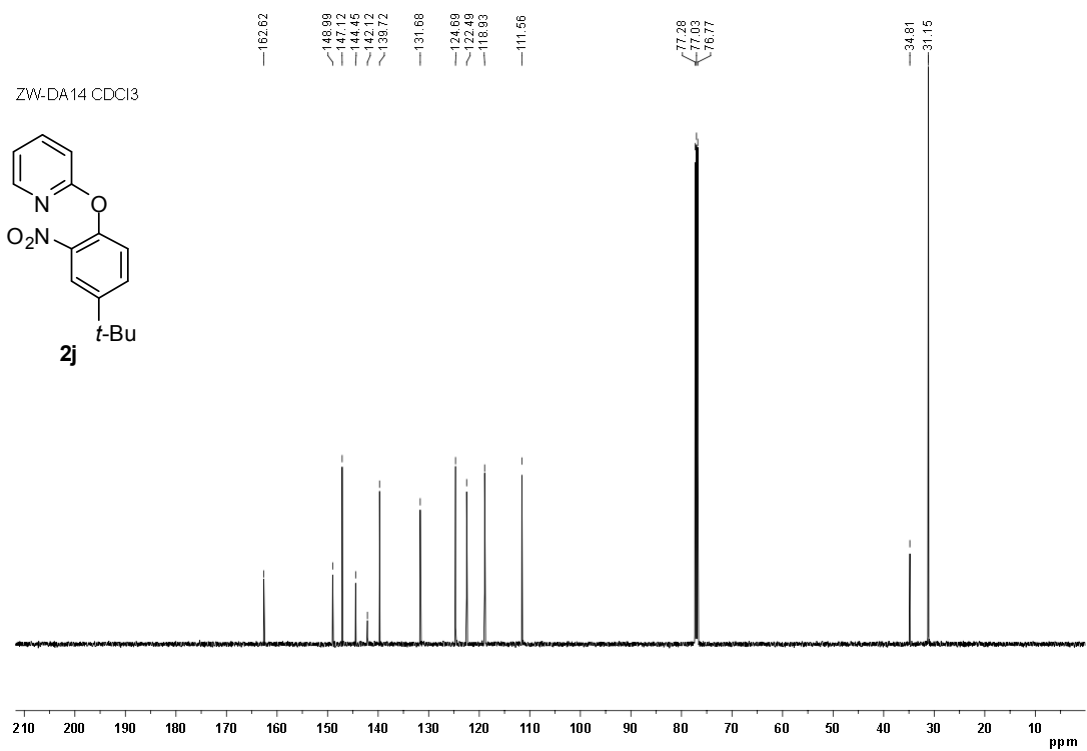

ZW-DA16 CDCl<sub>3</sub>

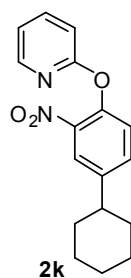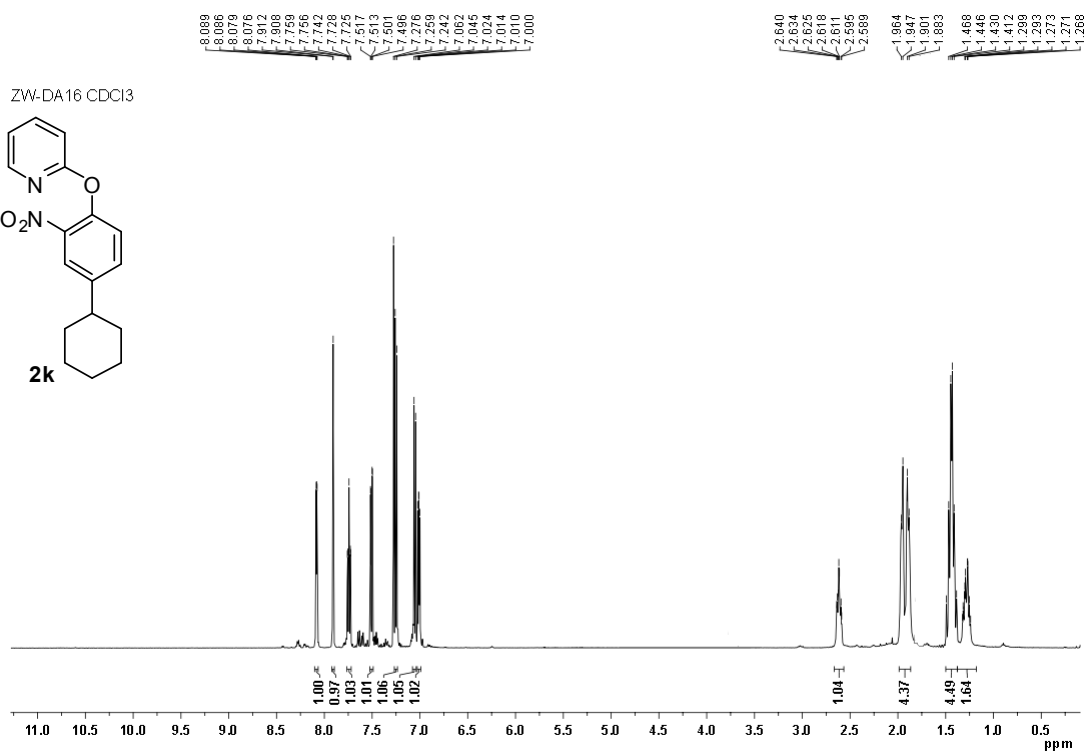

ZW-DA16 CDCl<sub>3</sub>

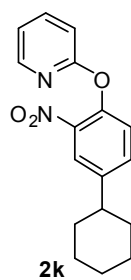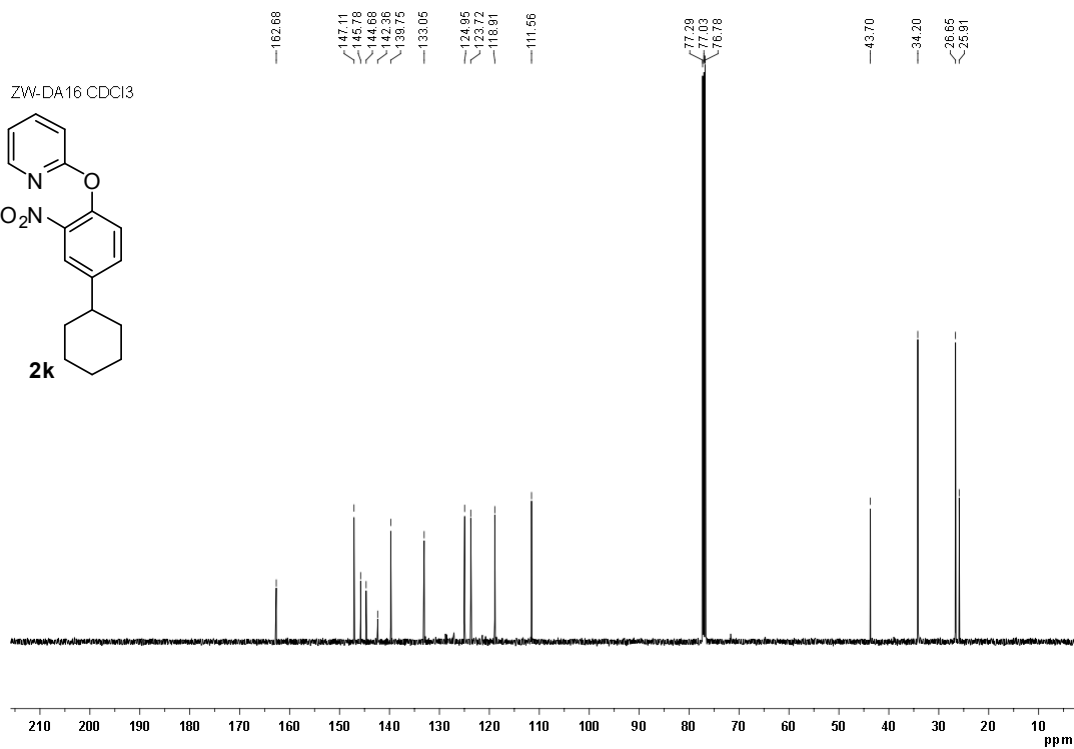

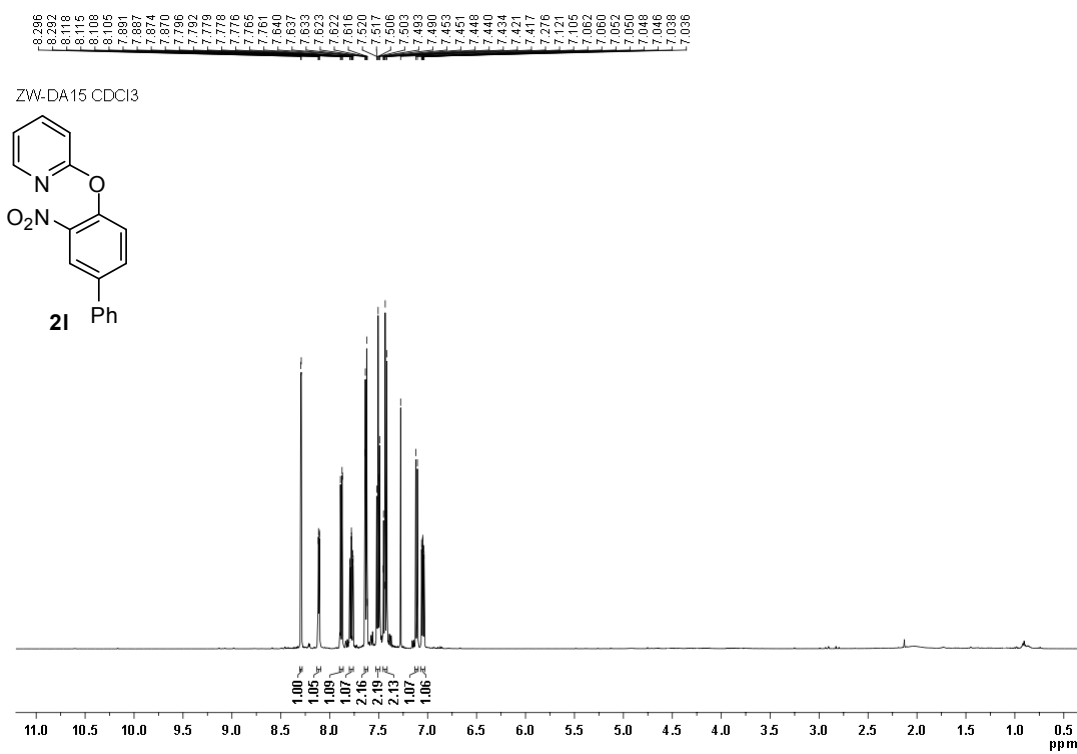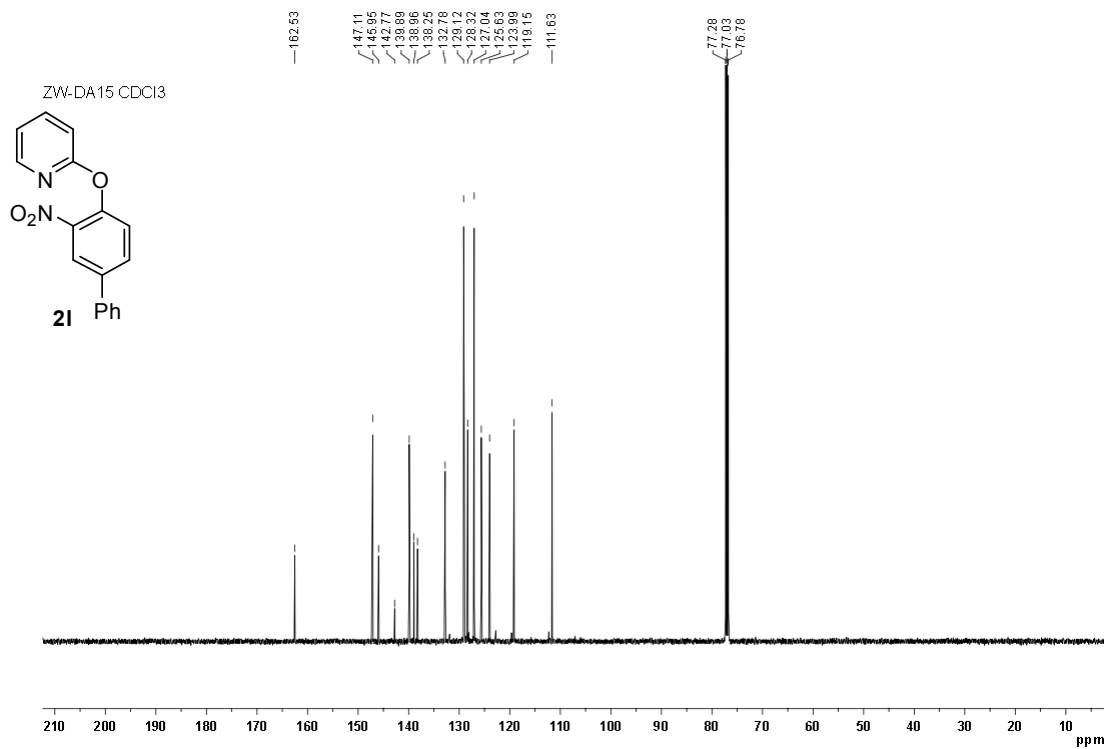

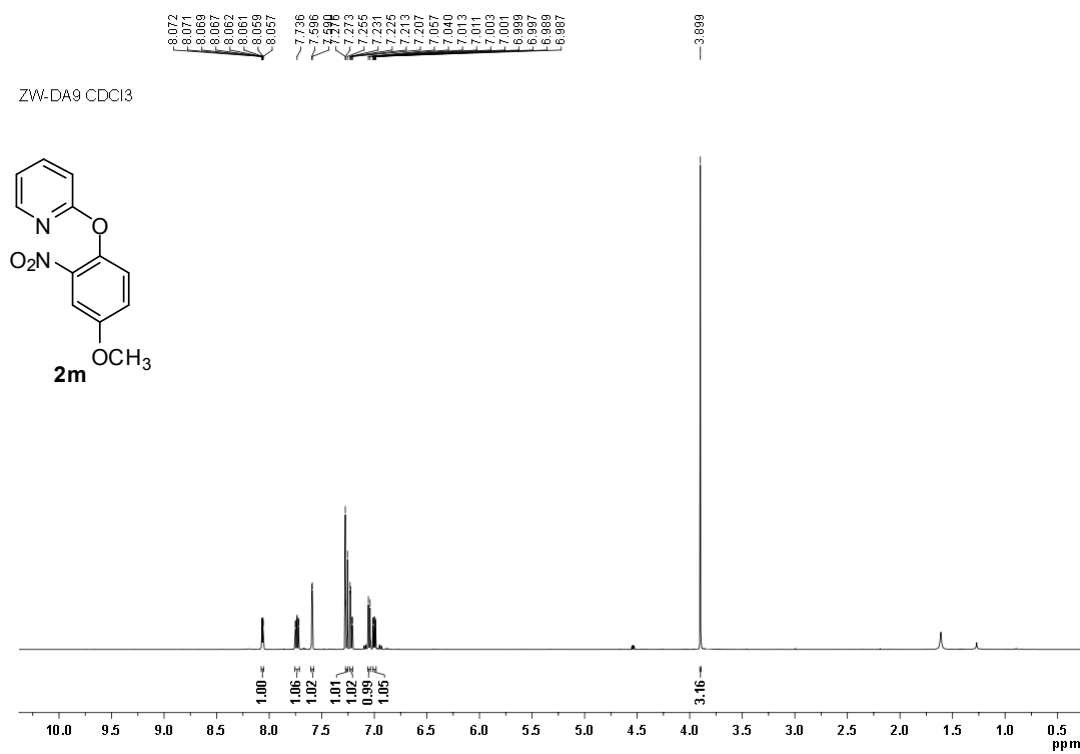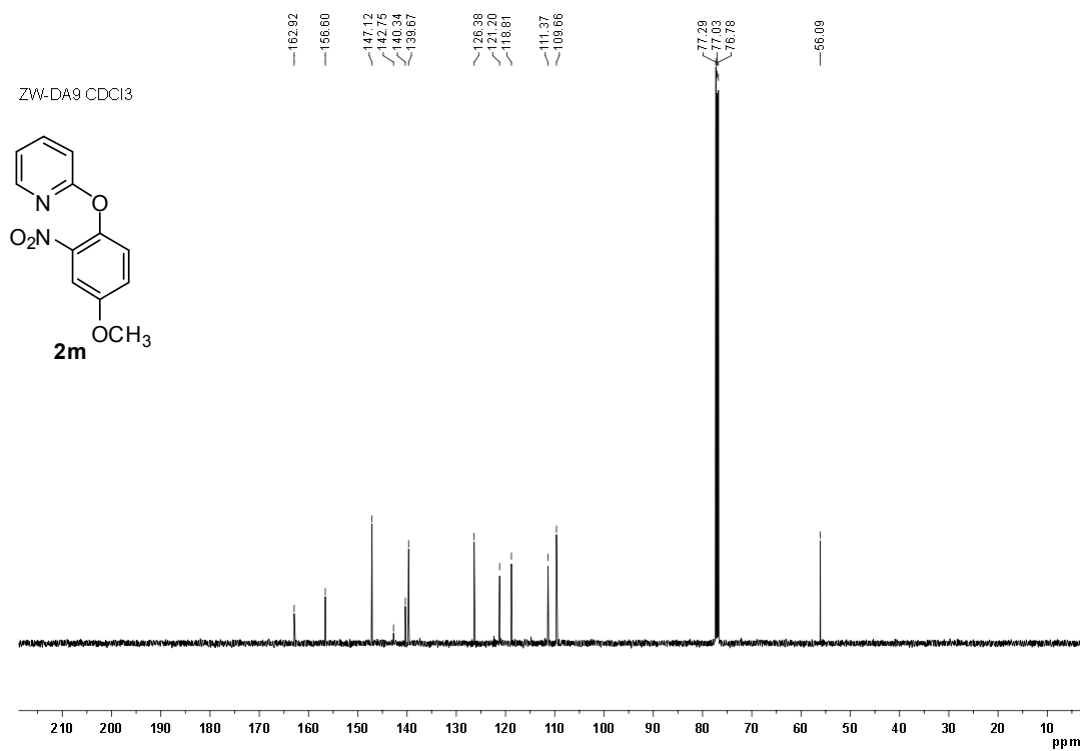



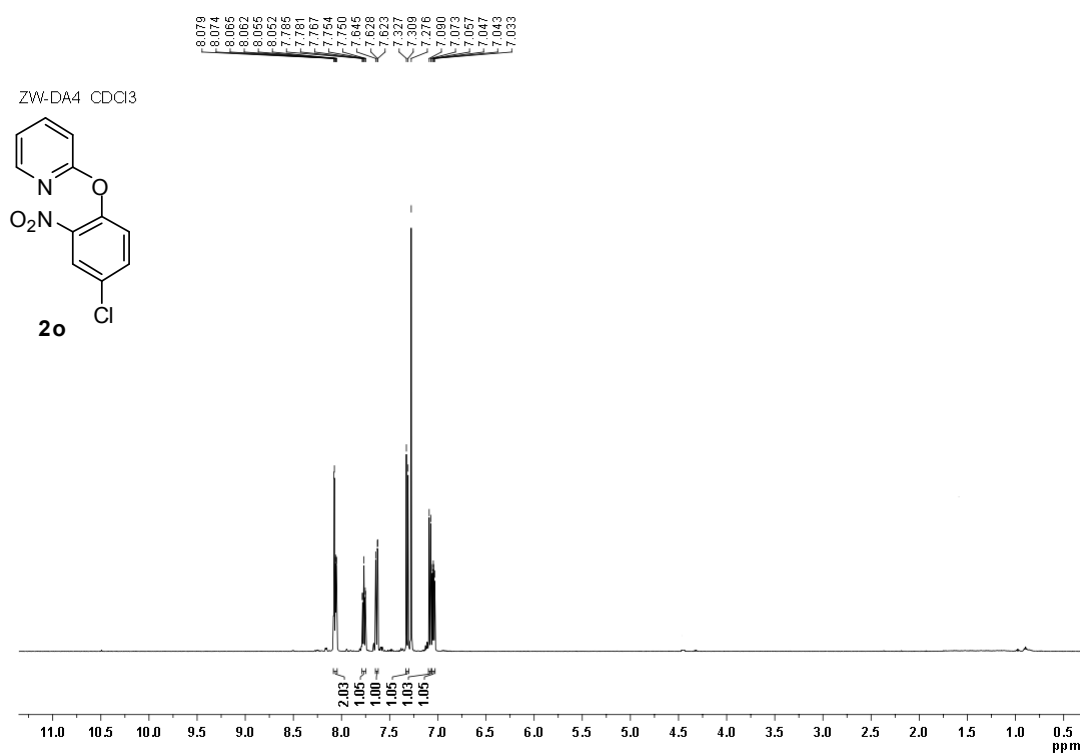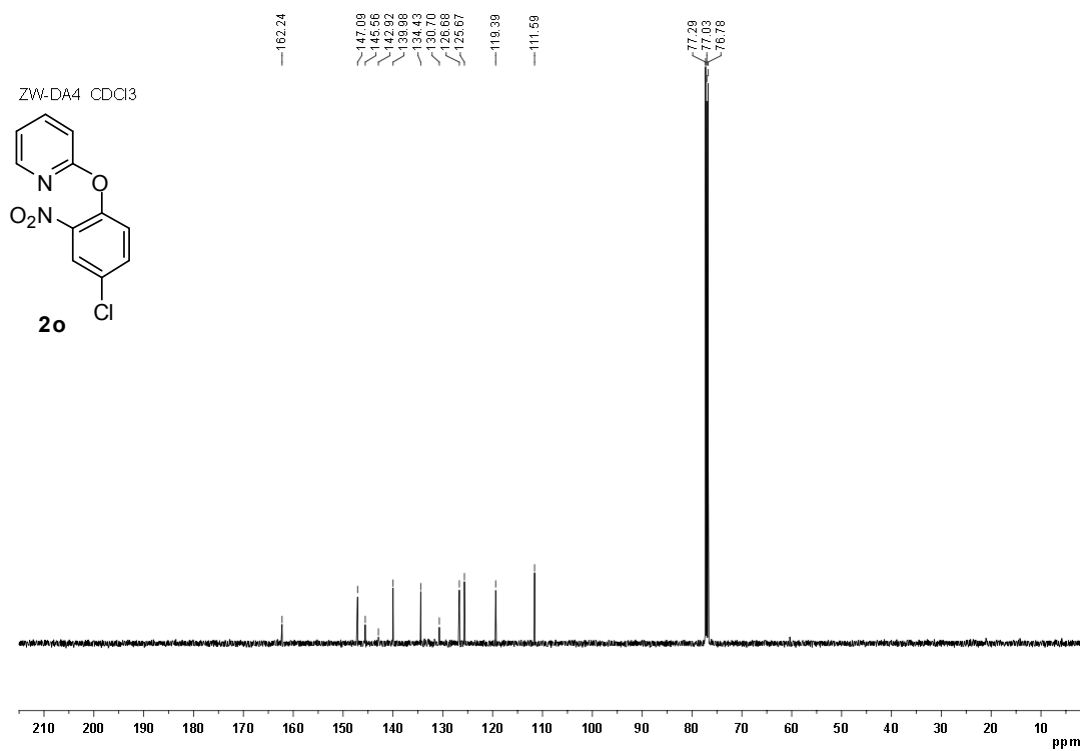



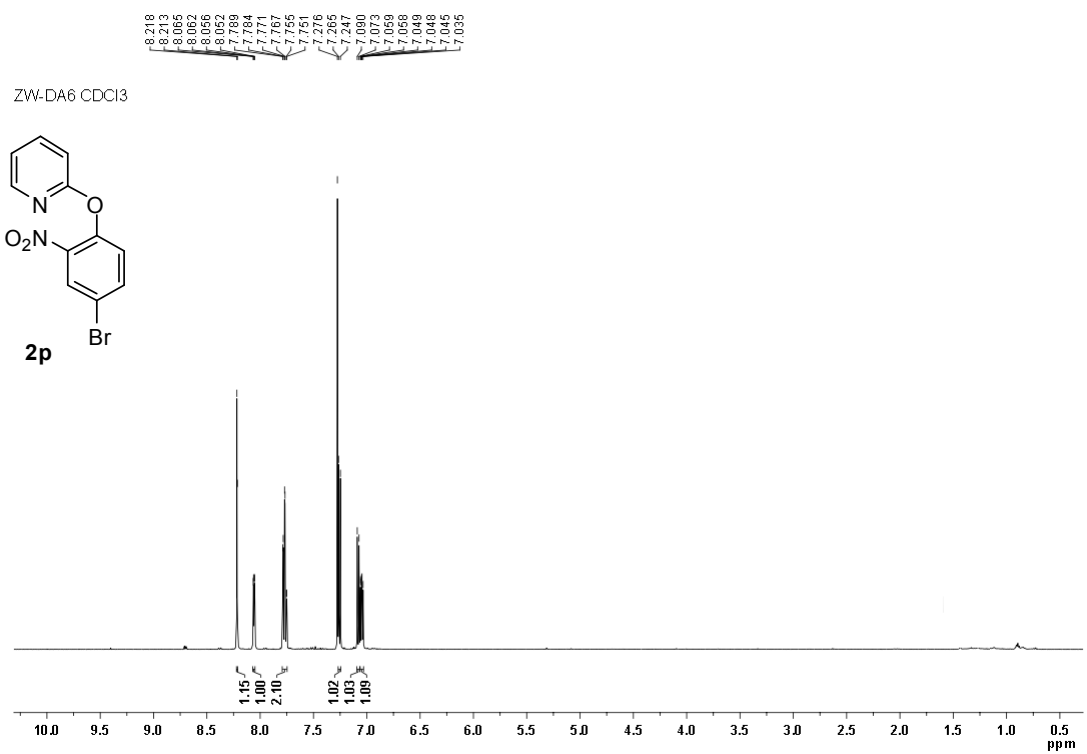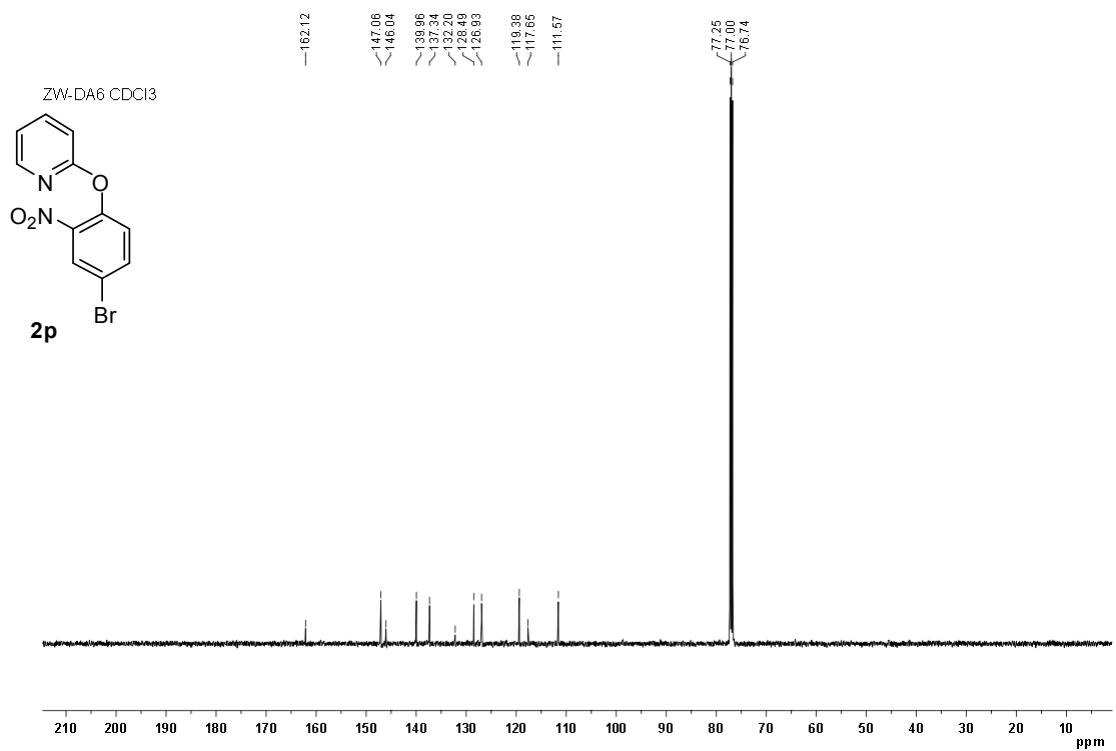

ZW-DA26 CDCl<sub>3</sub>

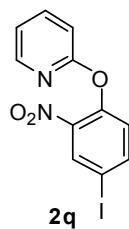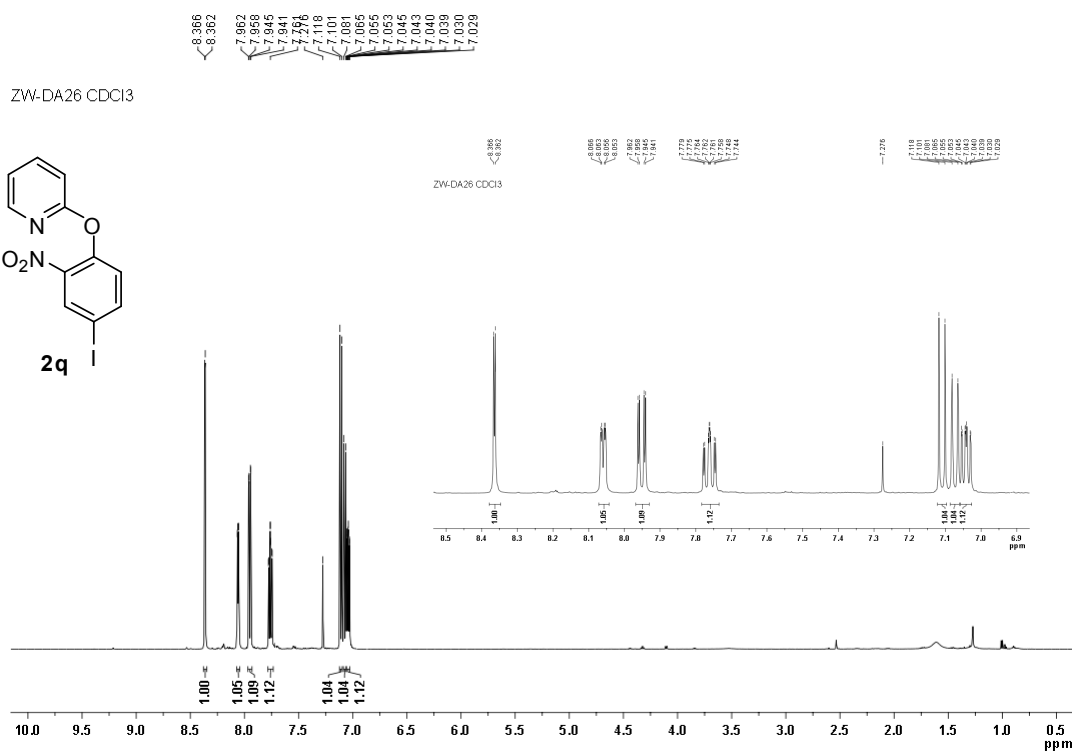

ZW-DA26 CDCl<sub>3</sub>

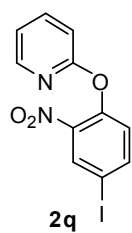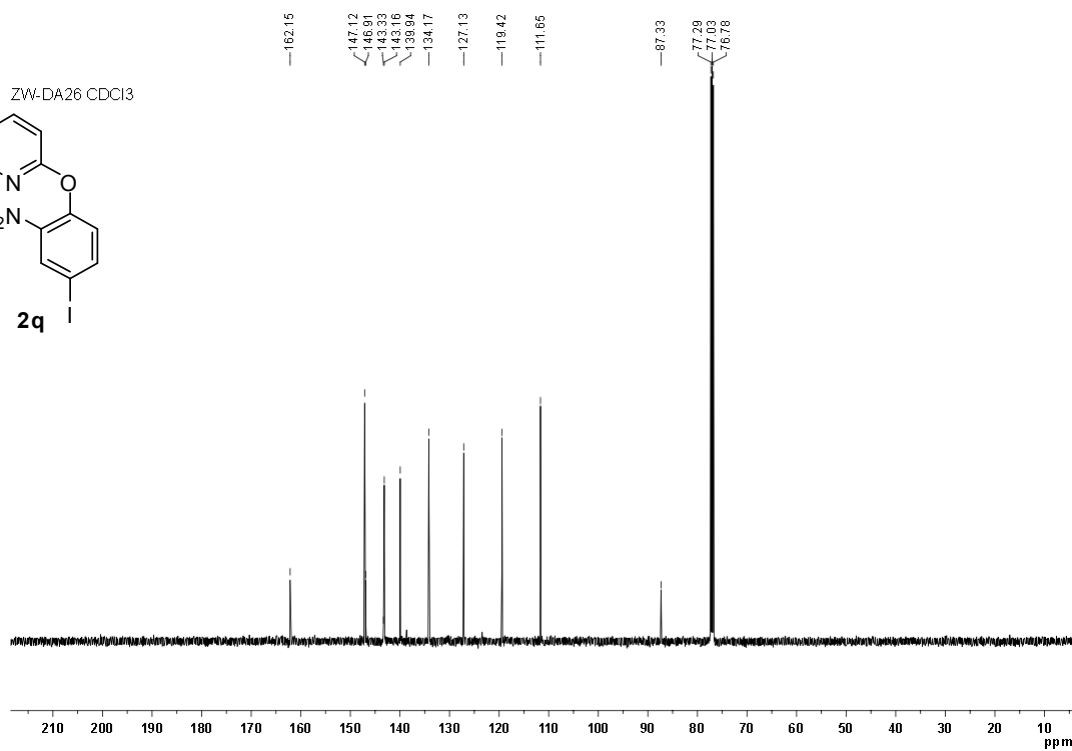

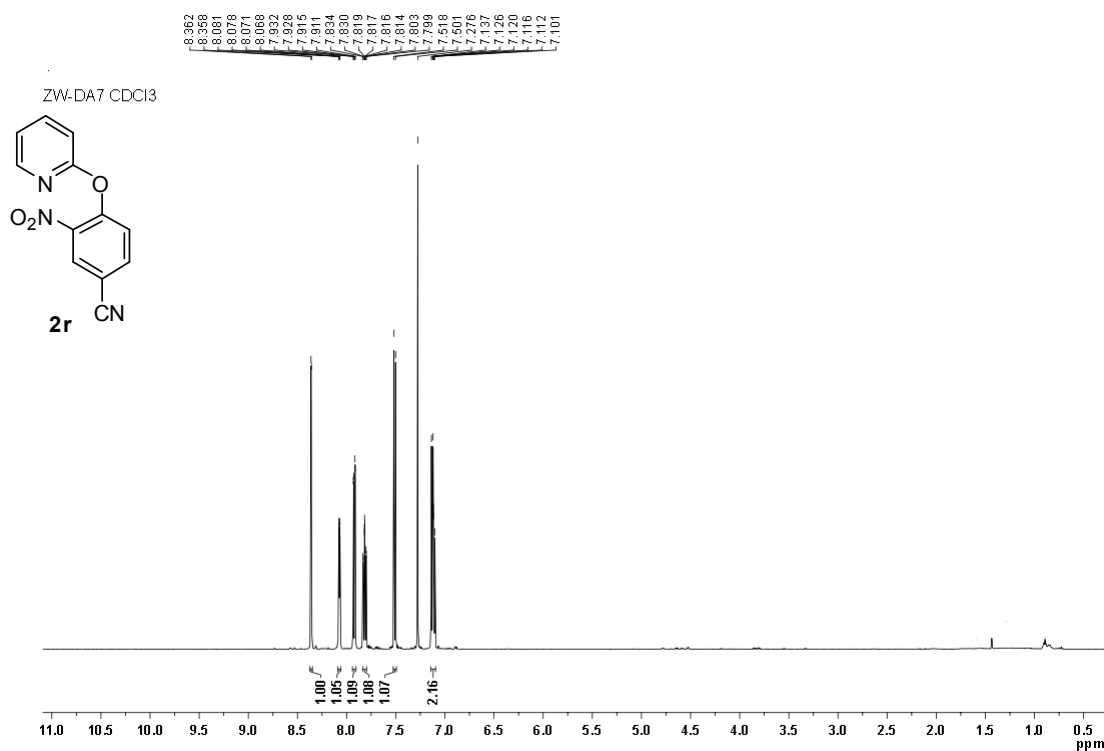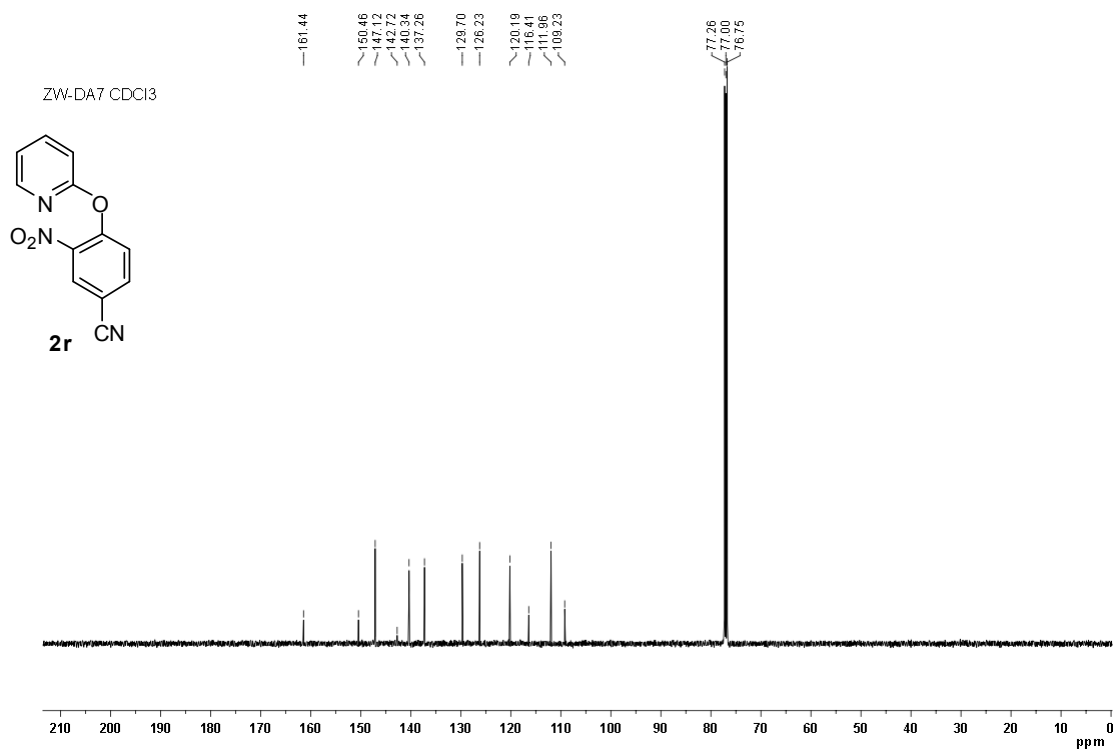

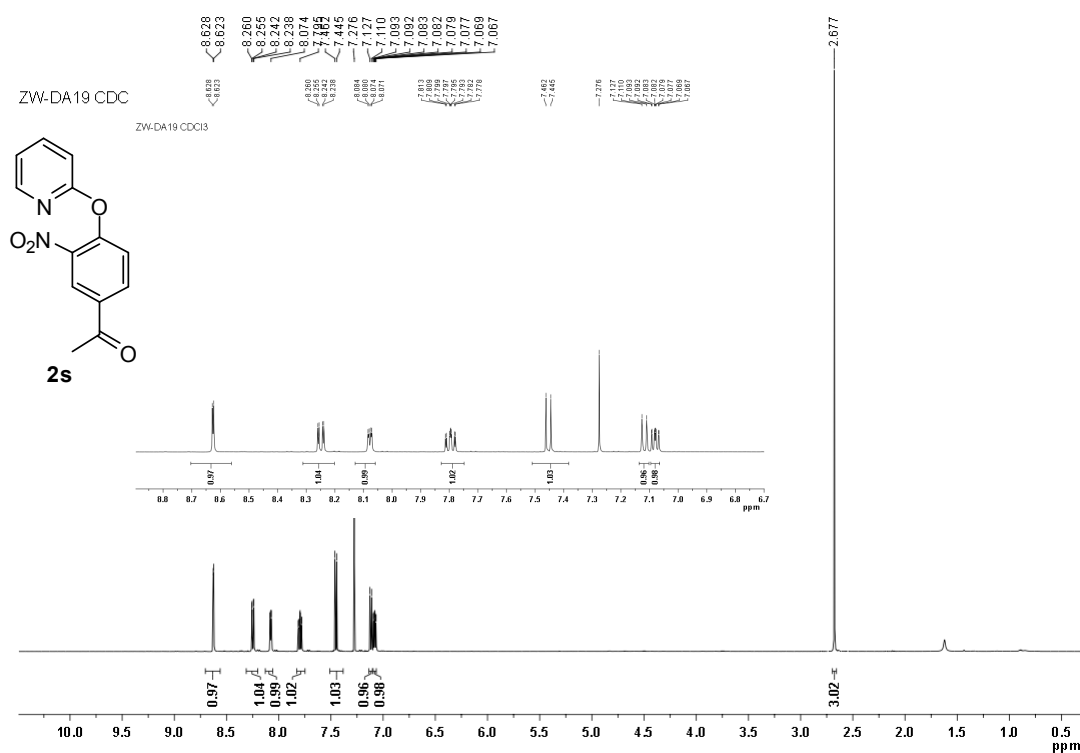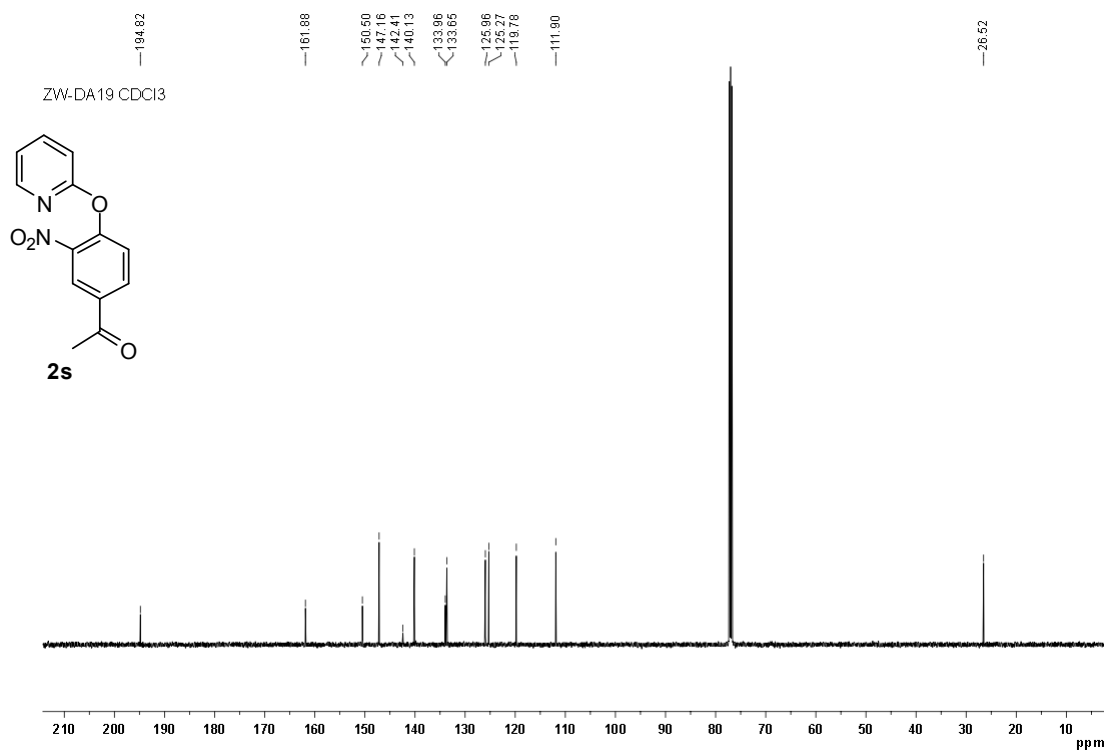

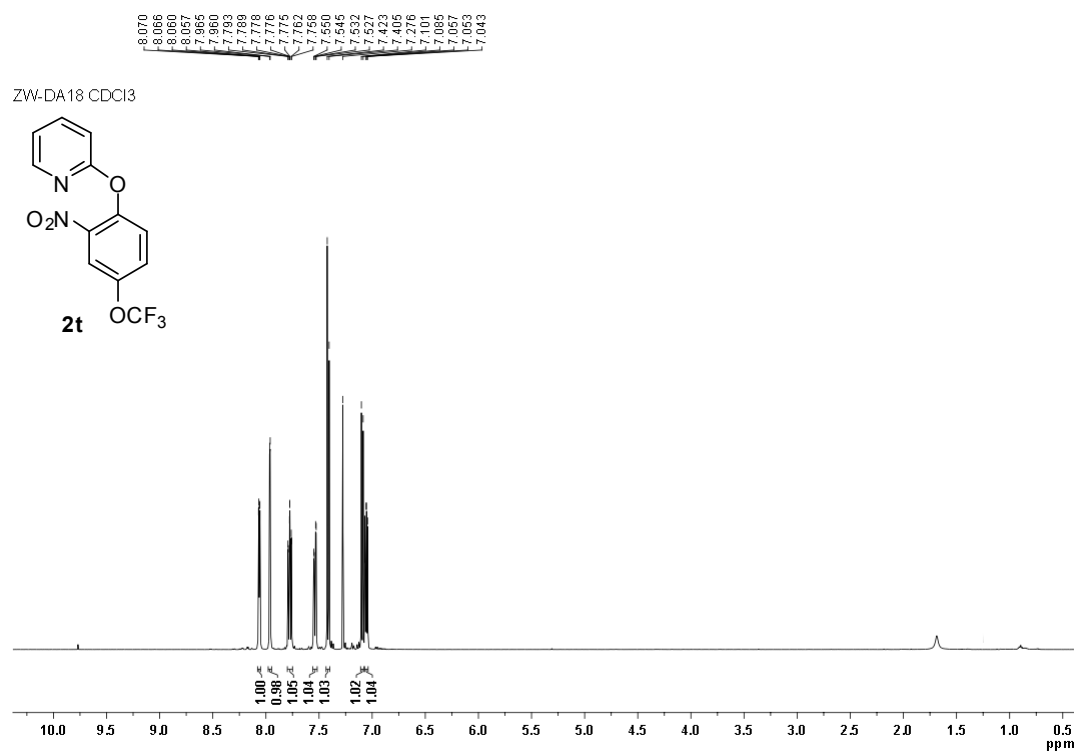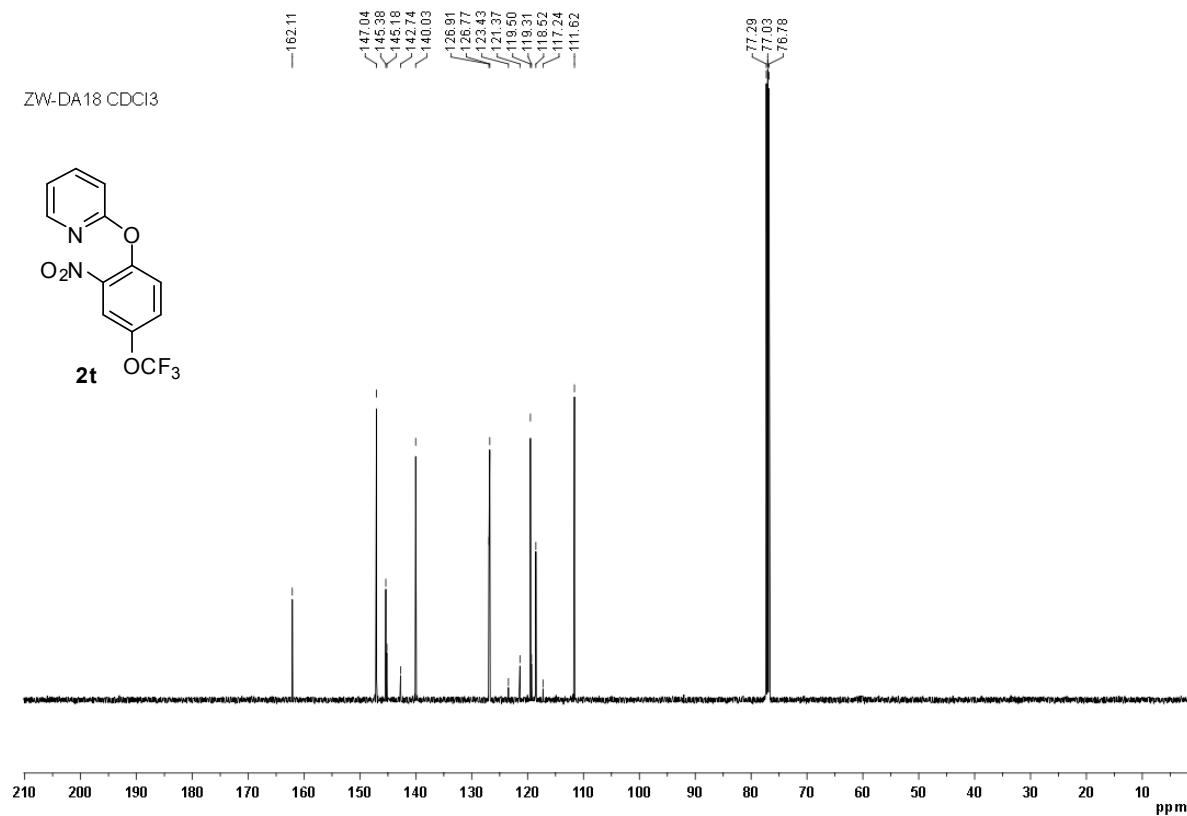

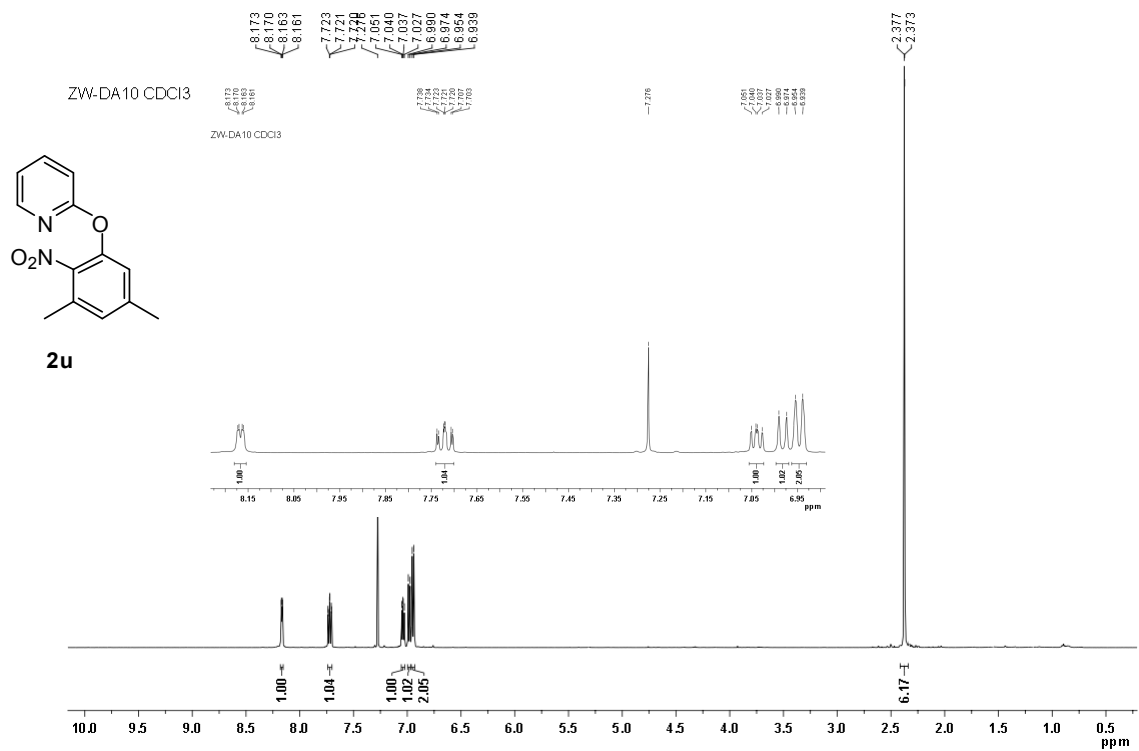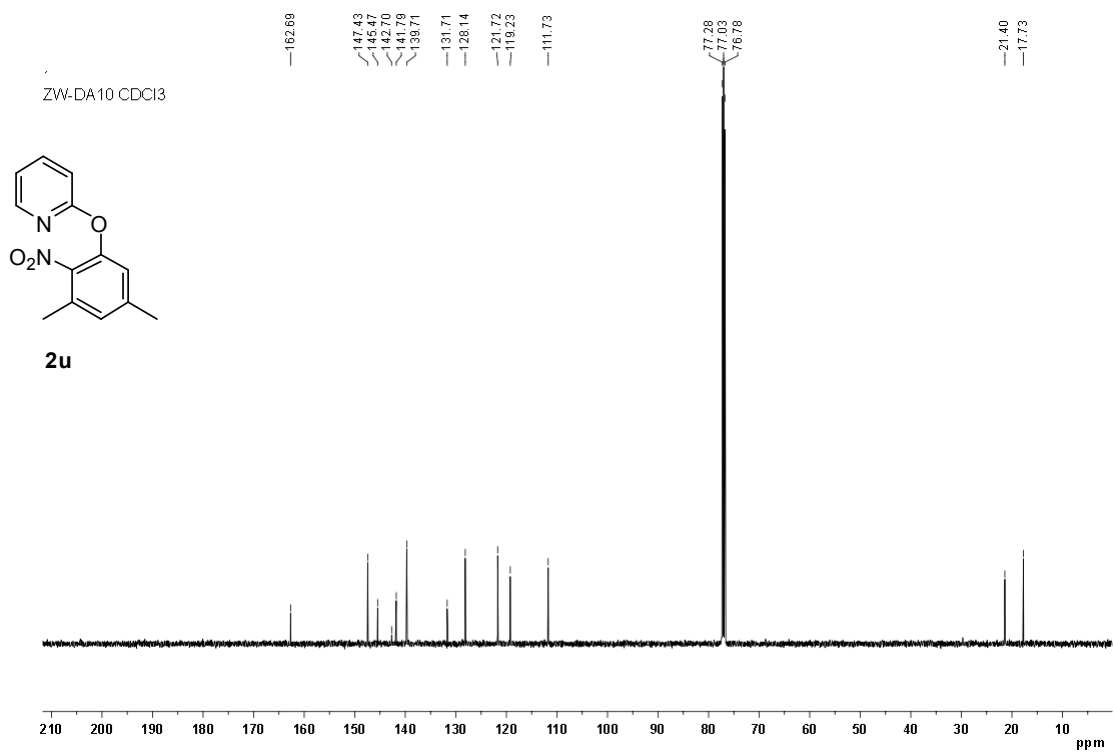

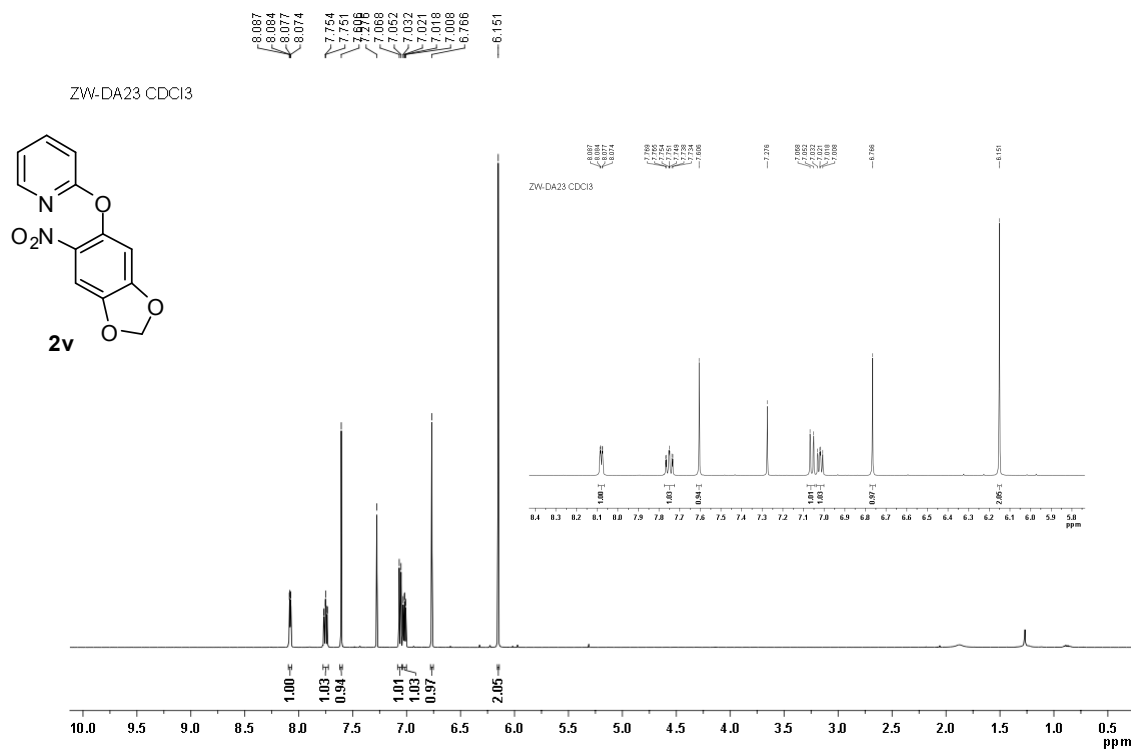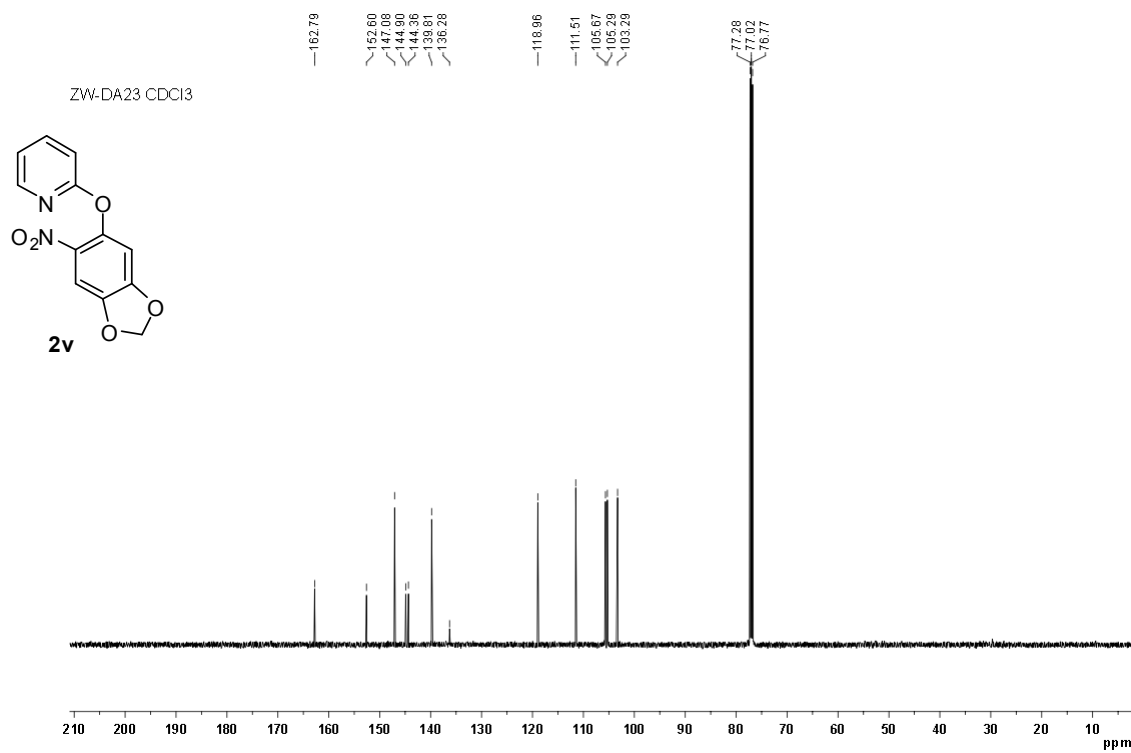

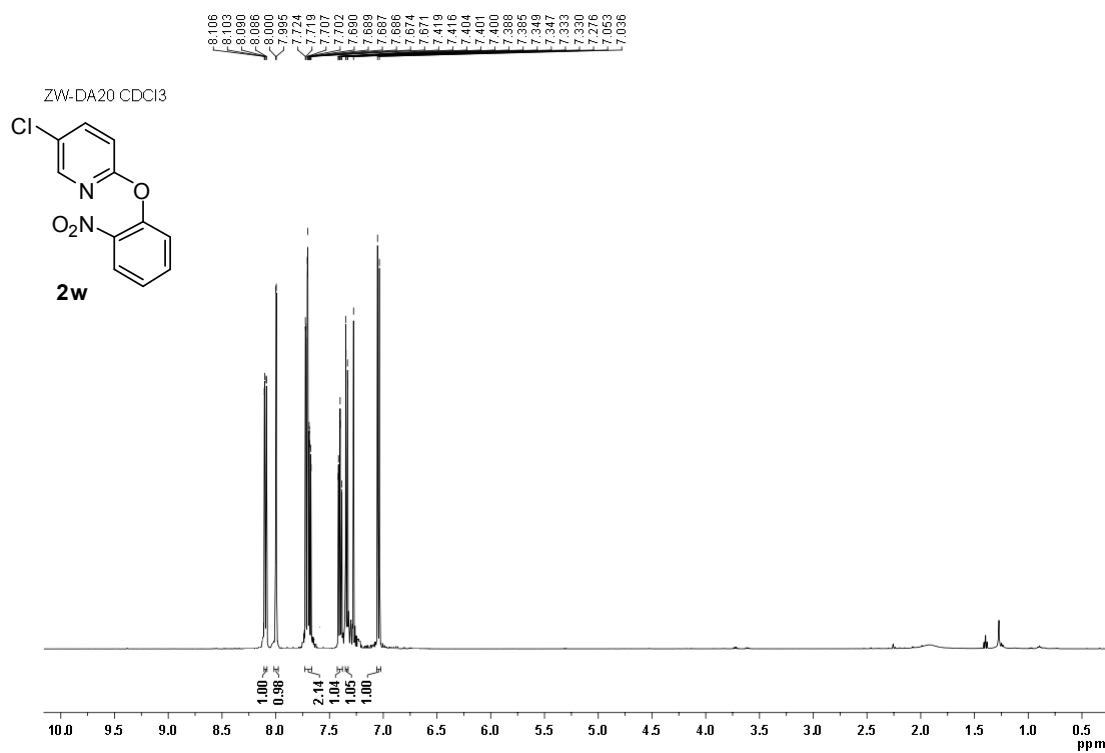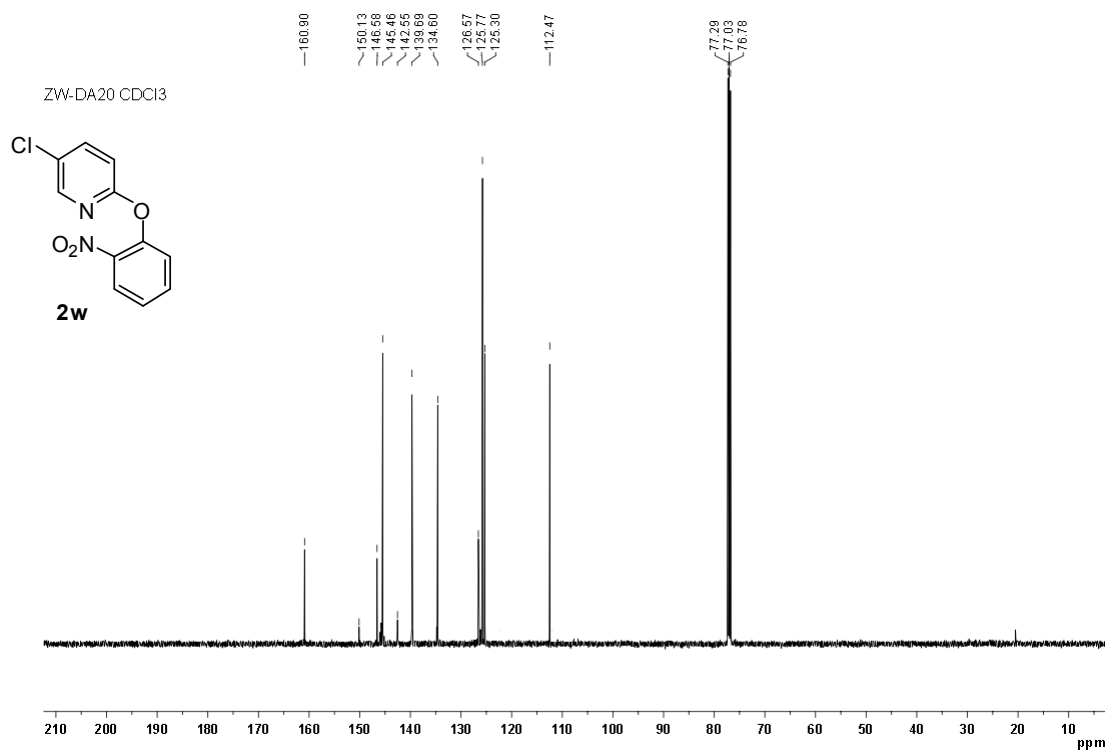





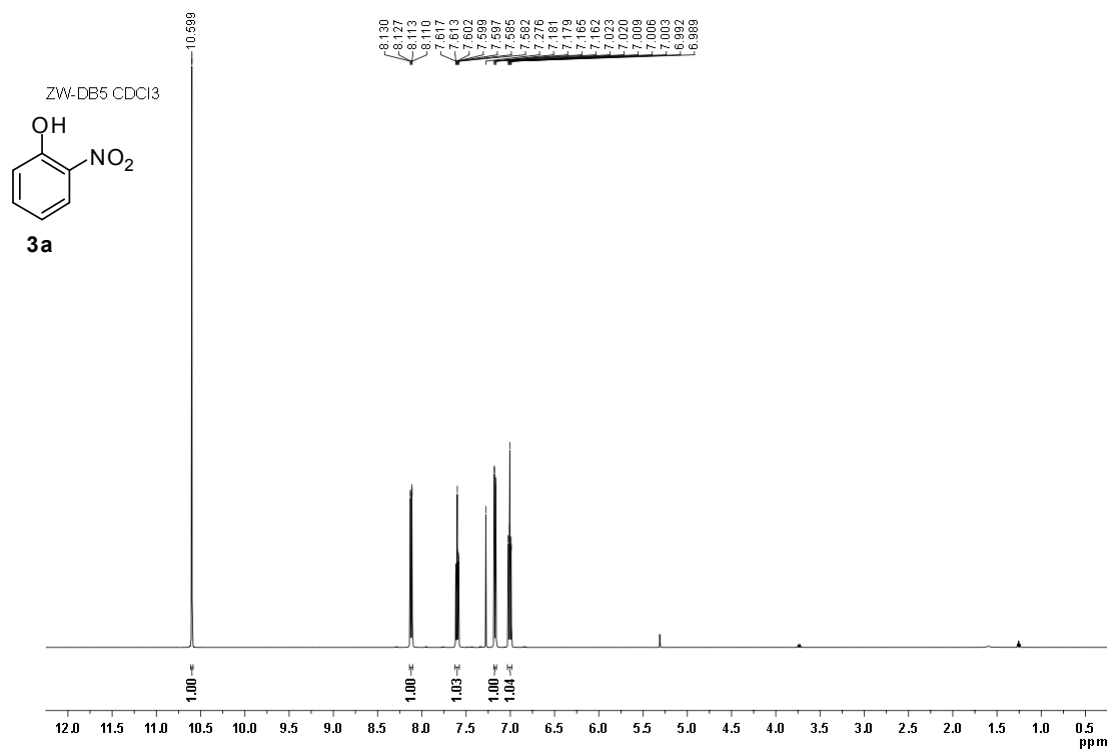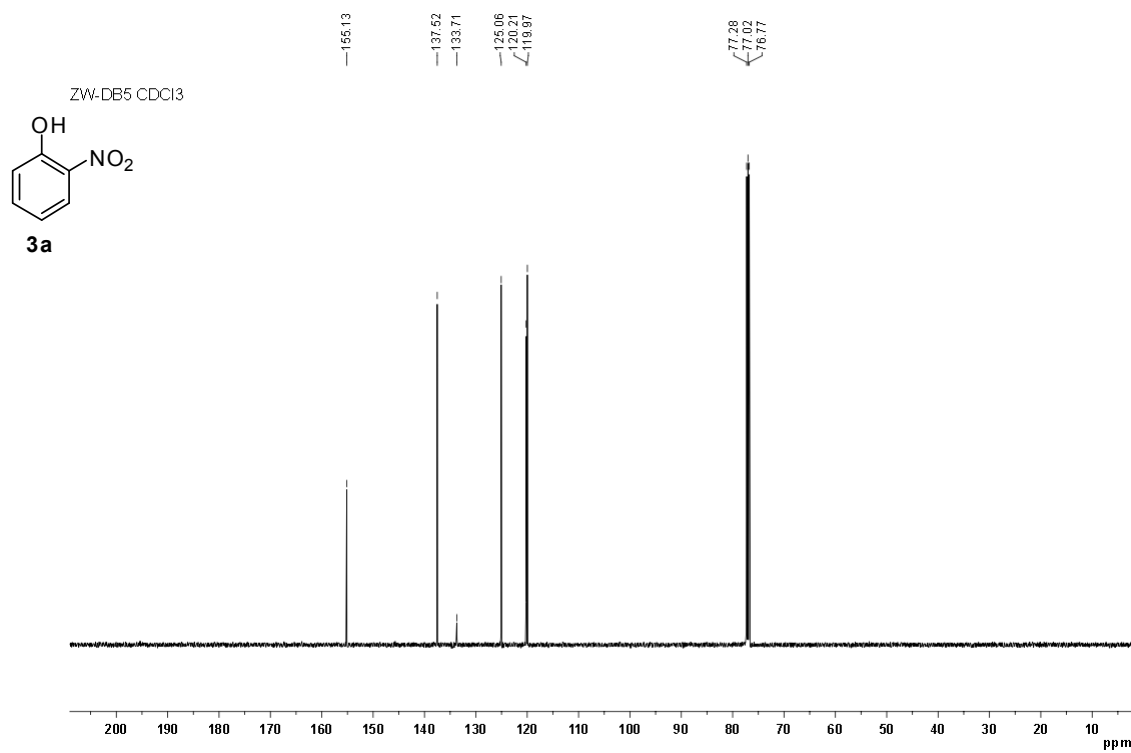

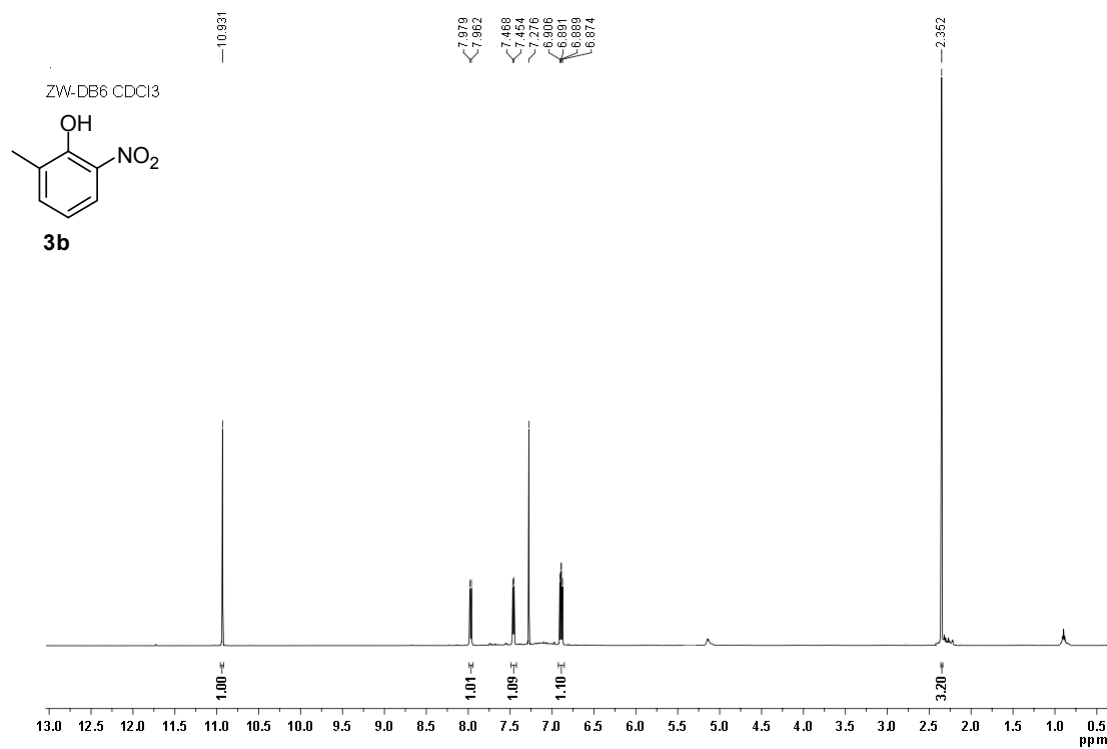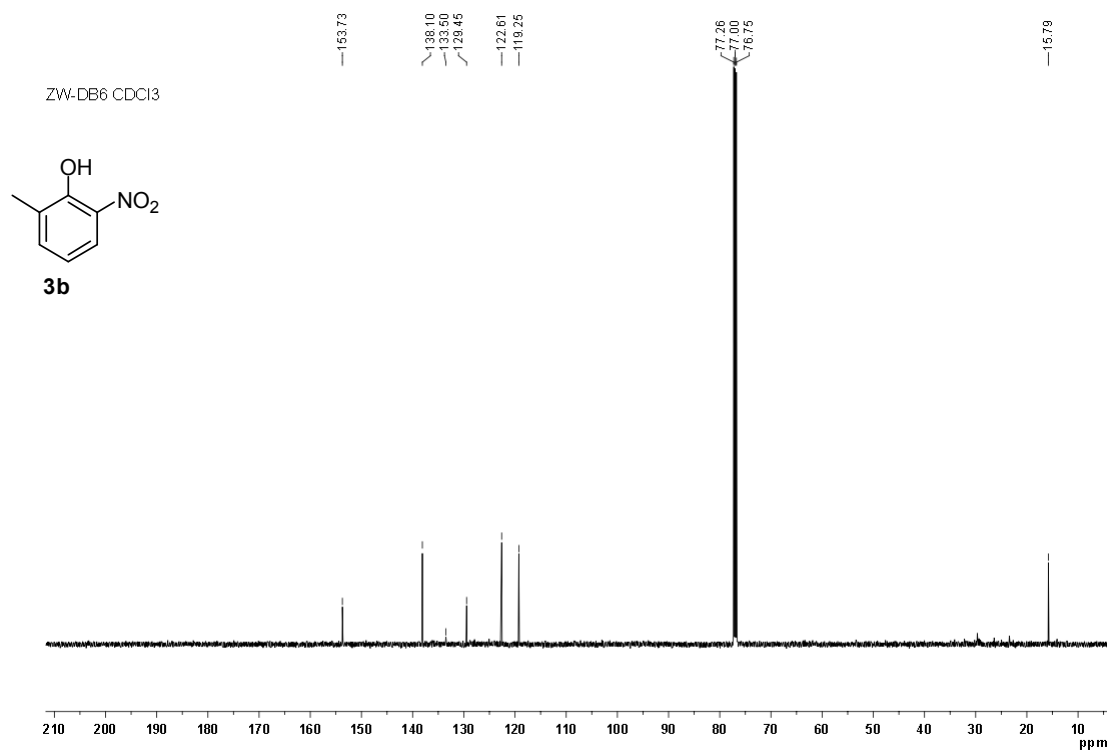

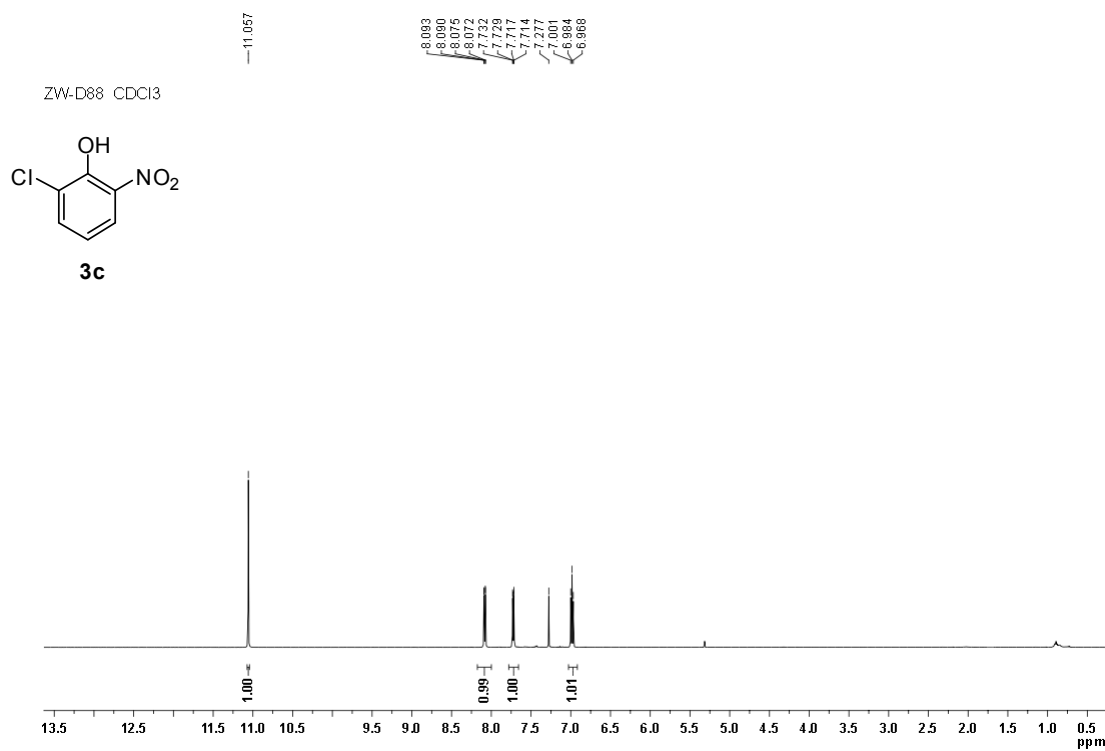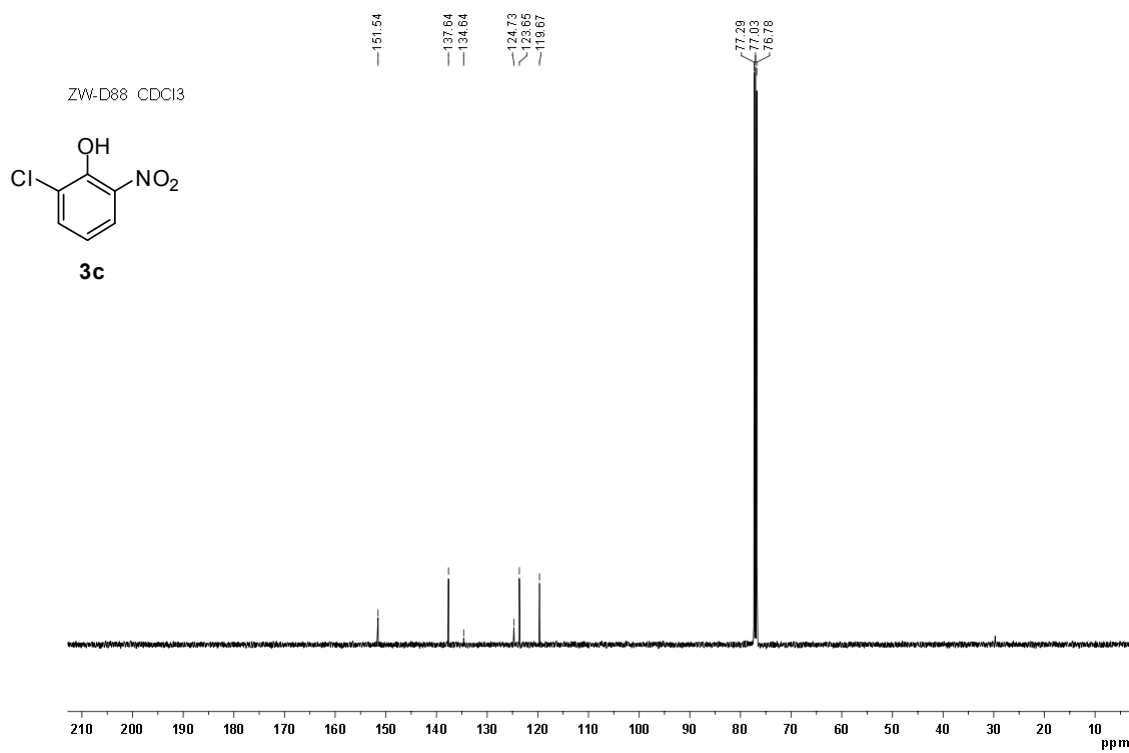

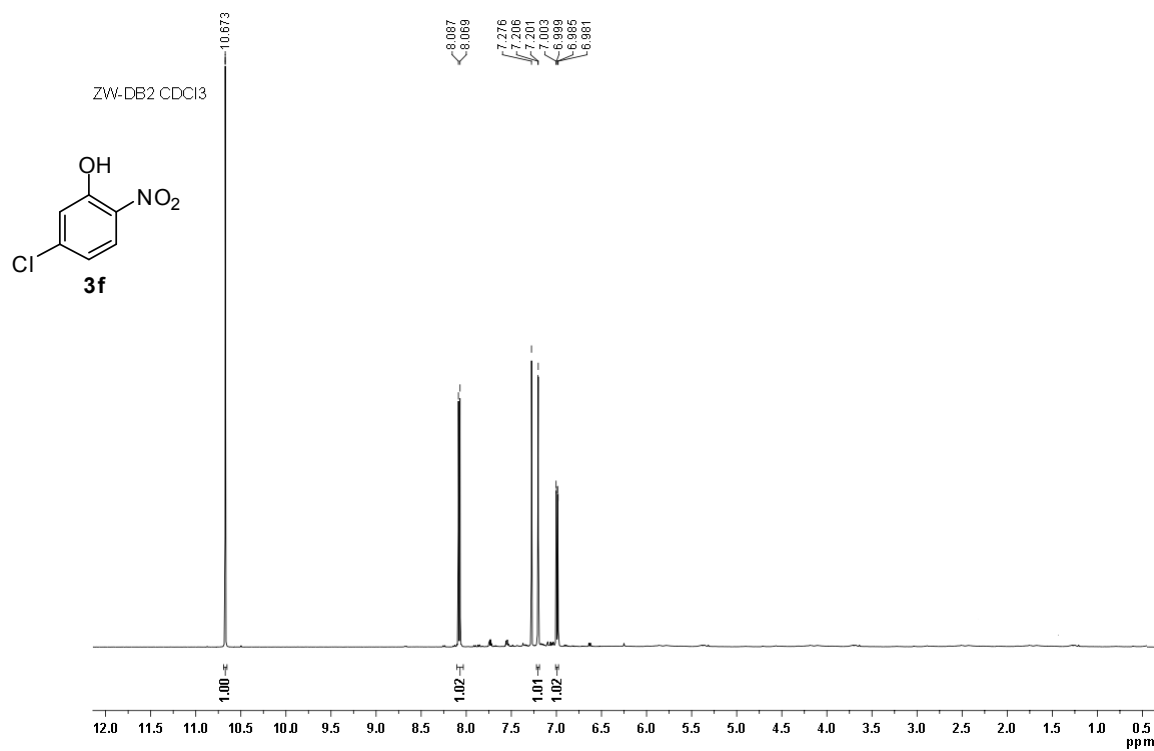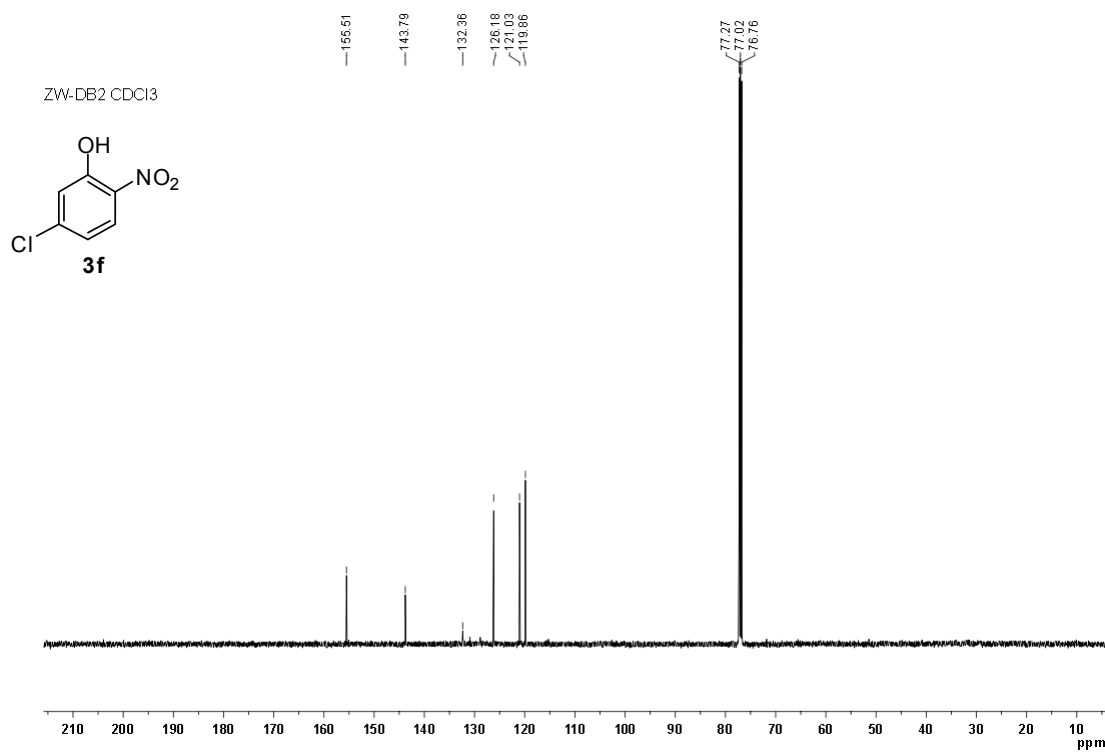

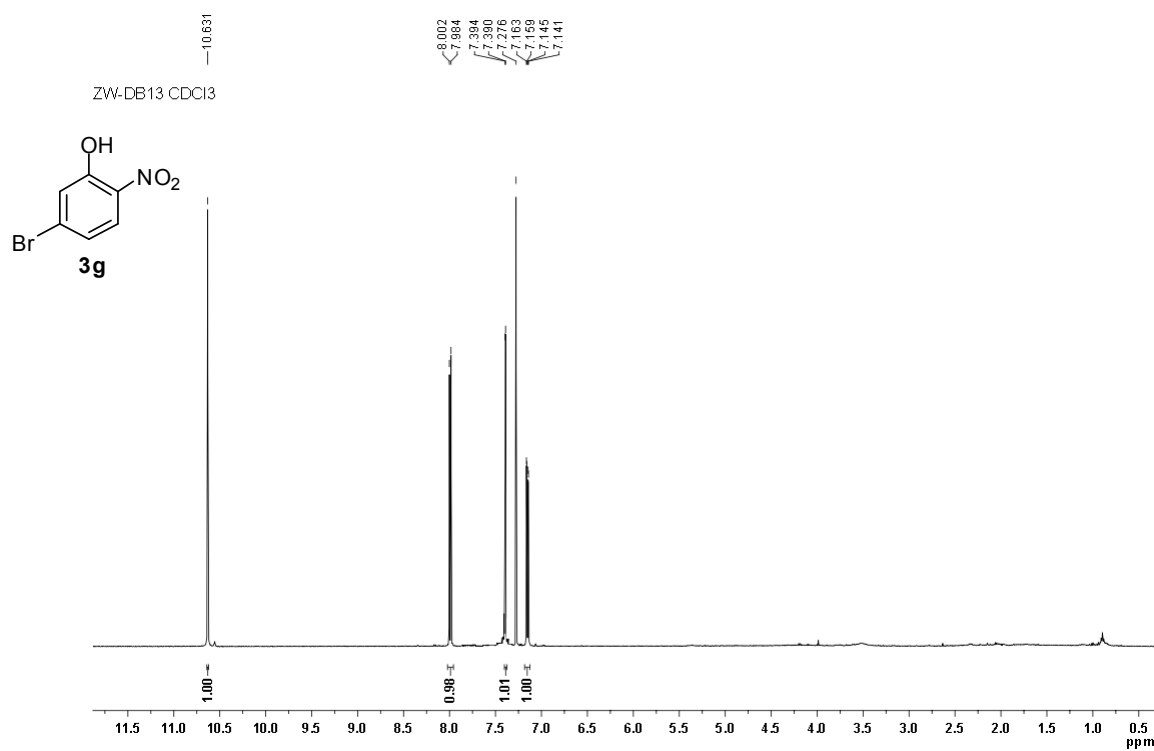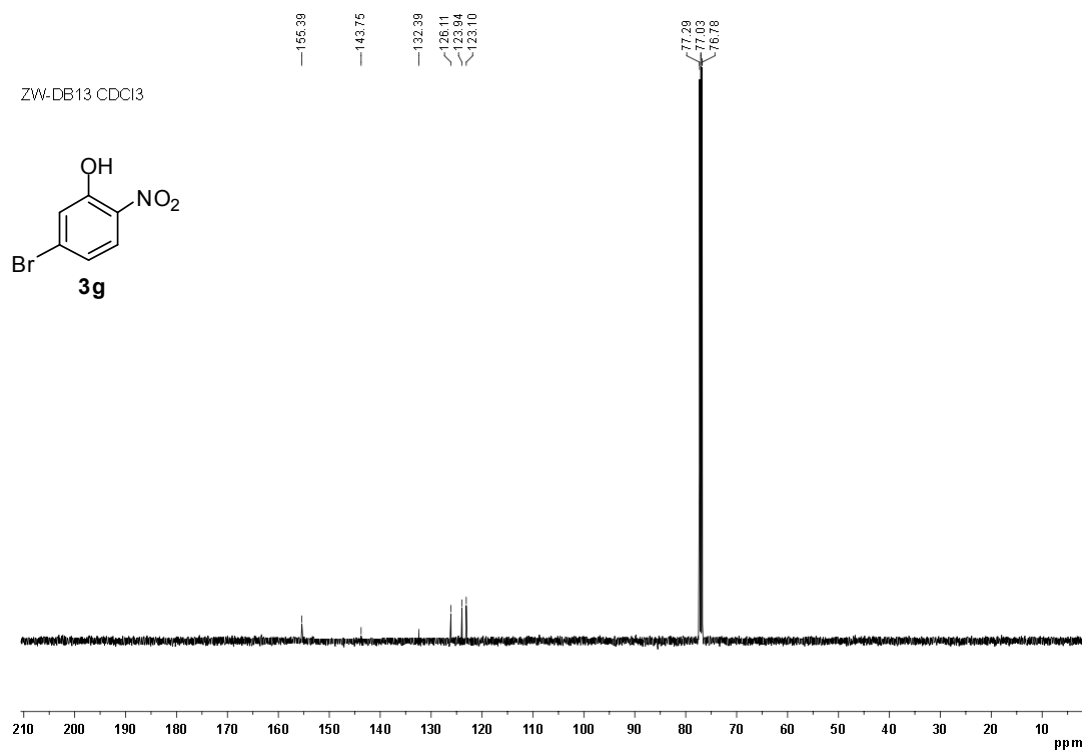

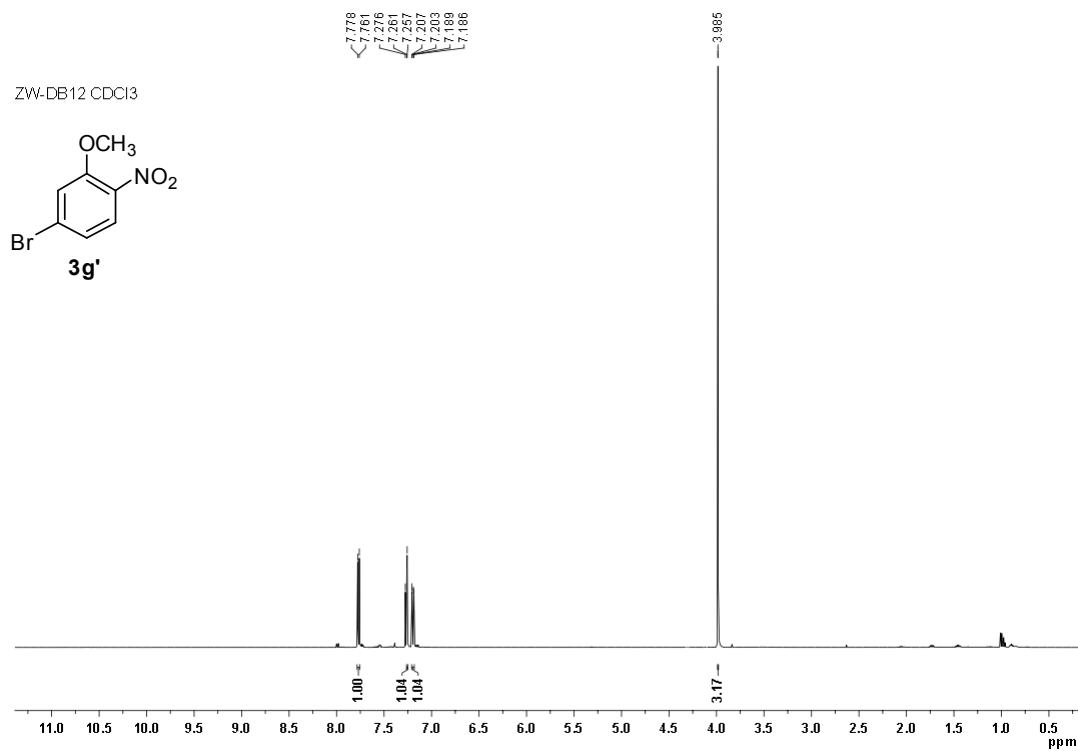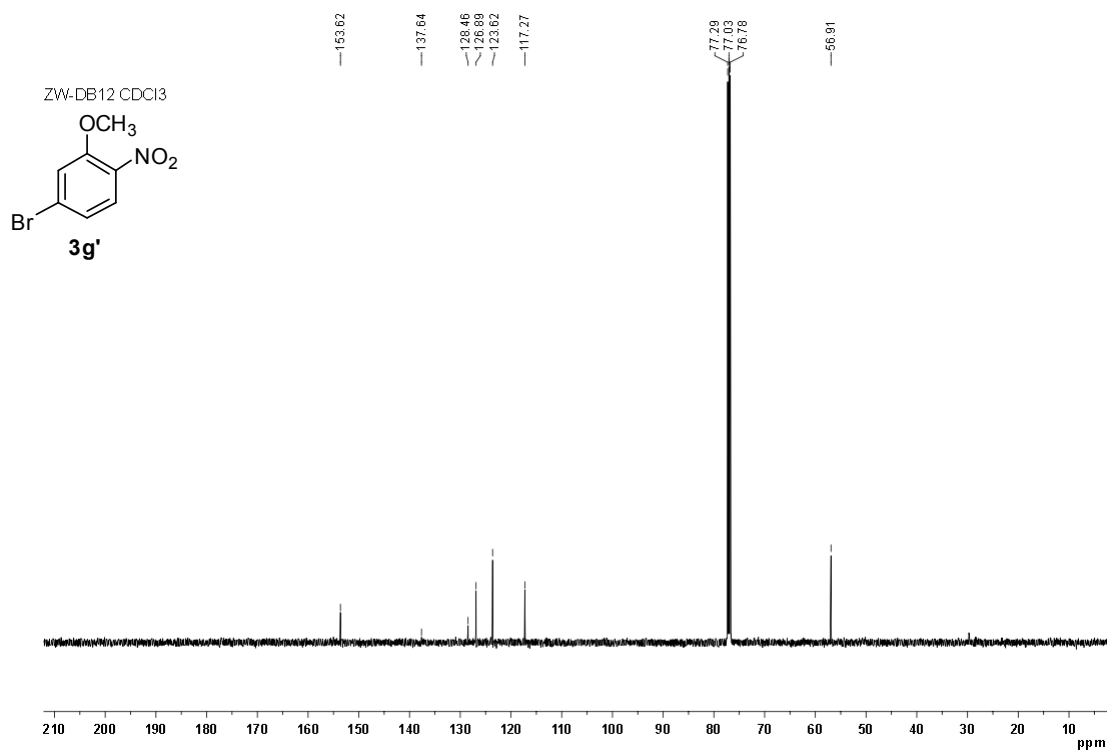

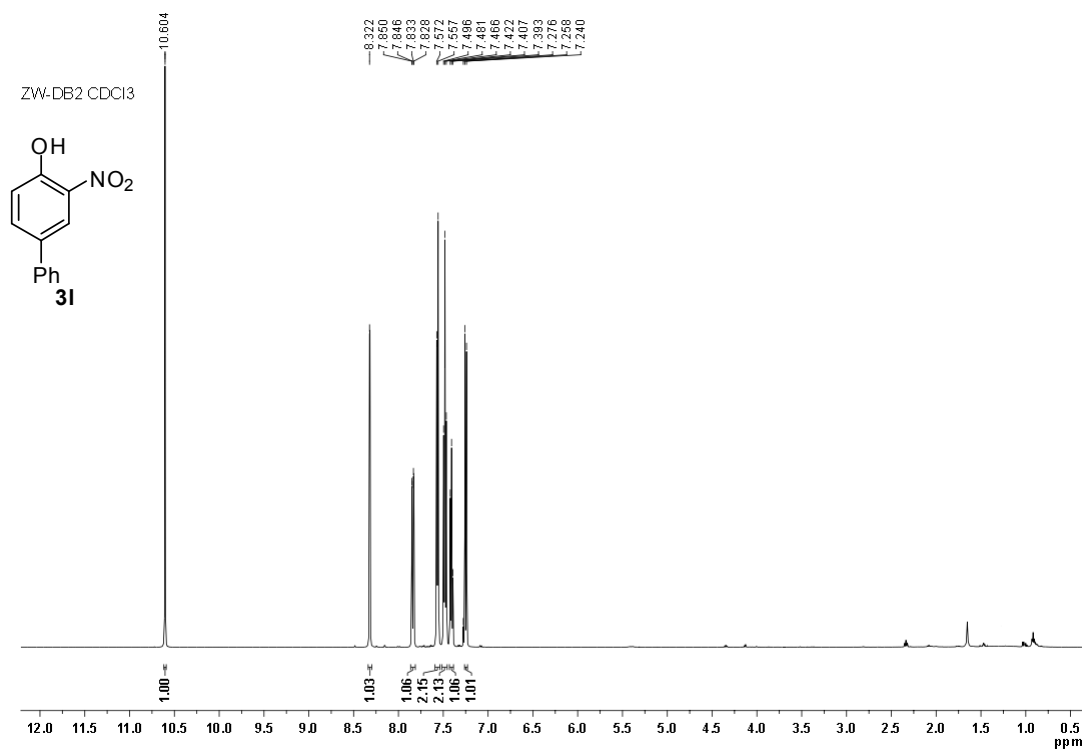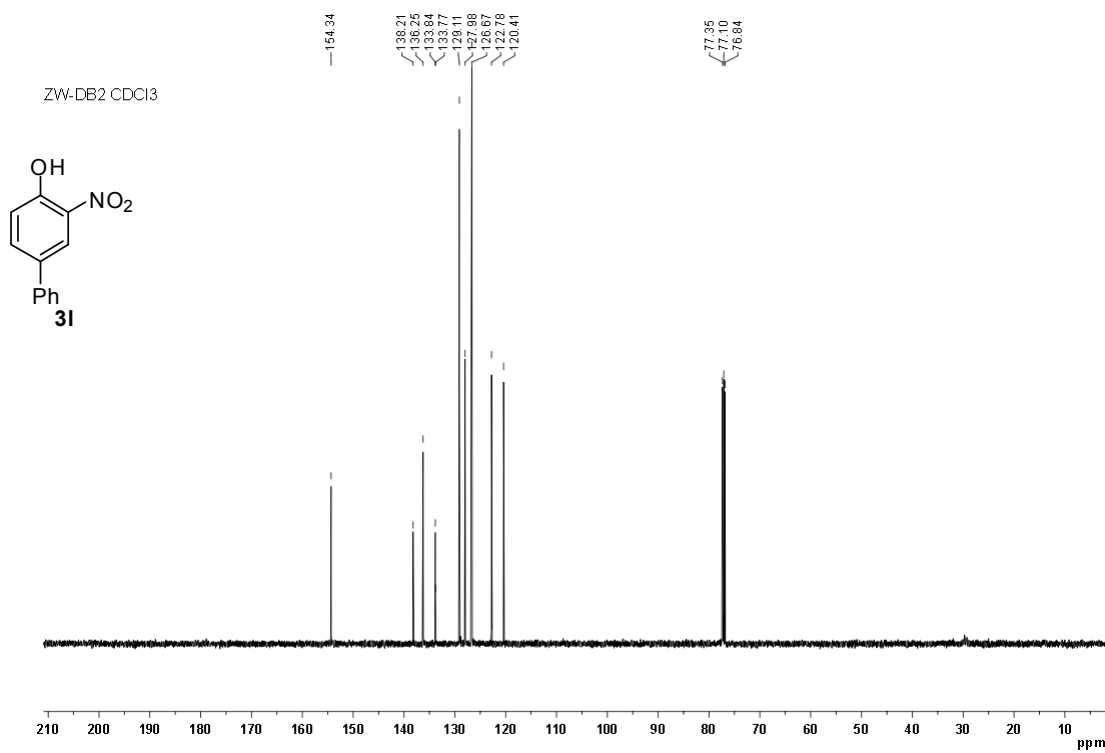



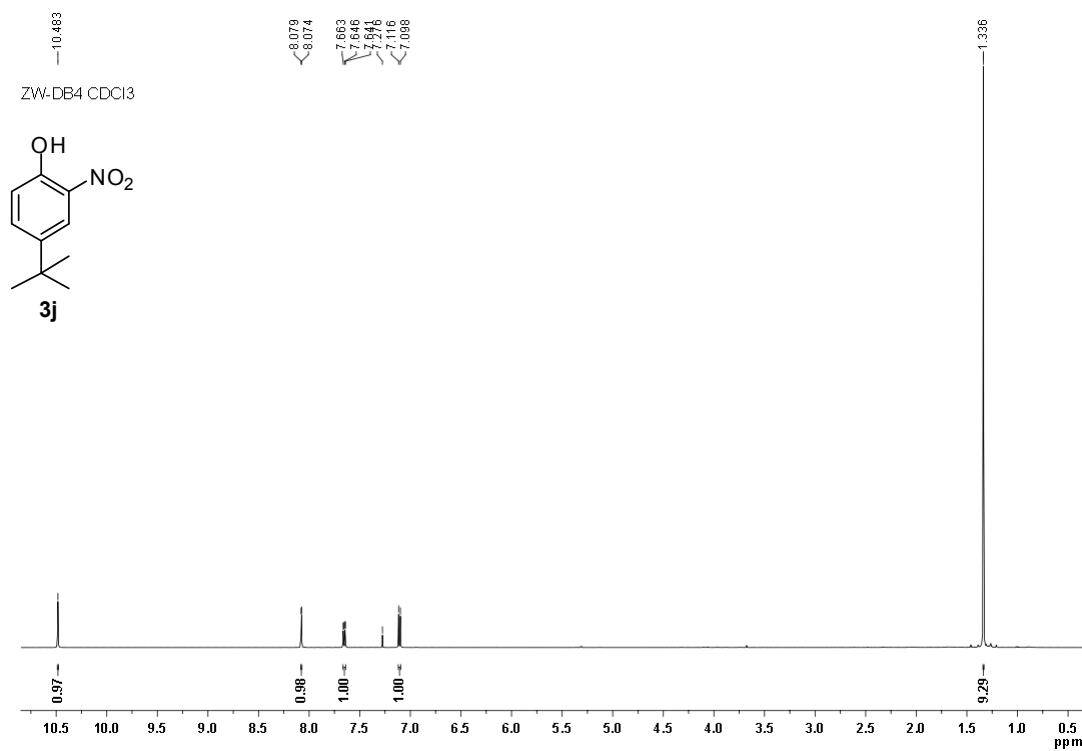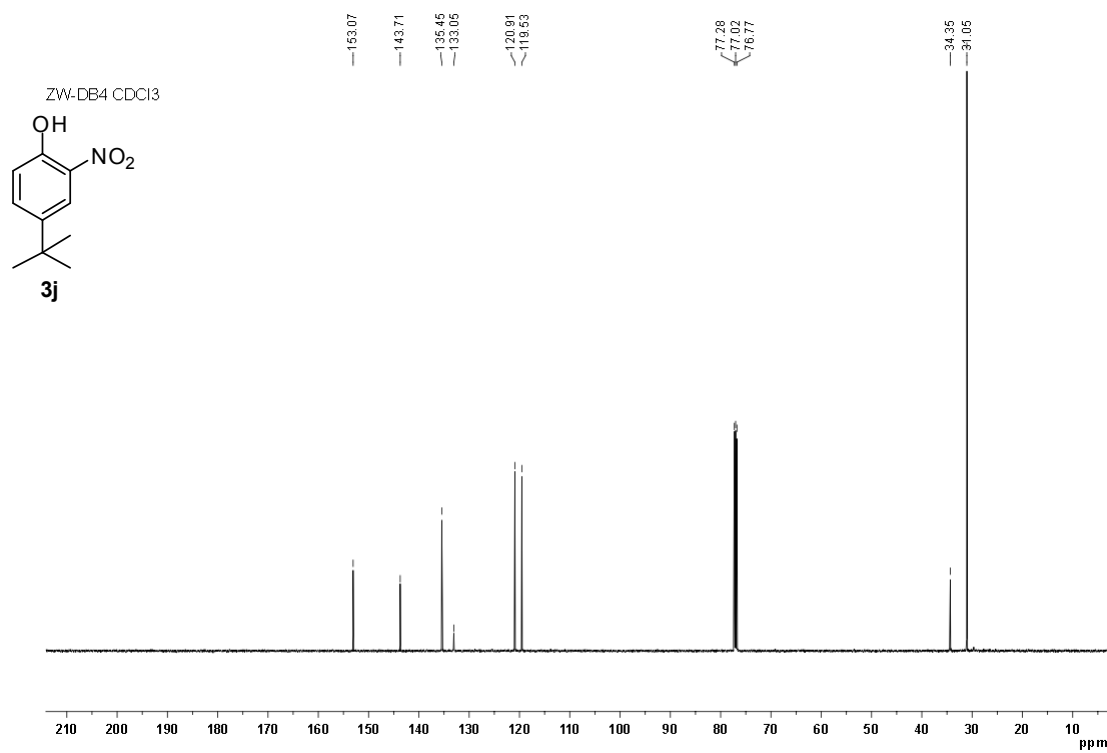

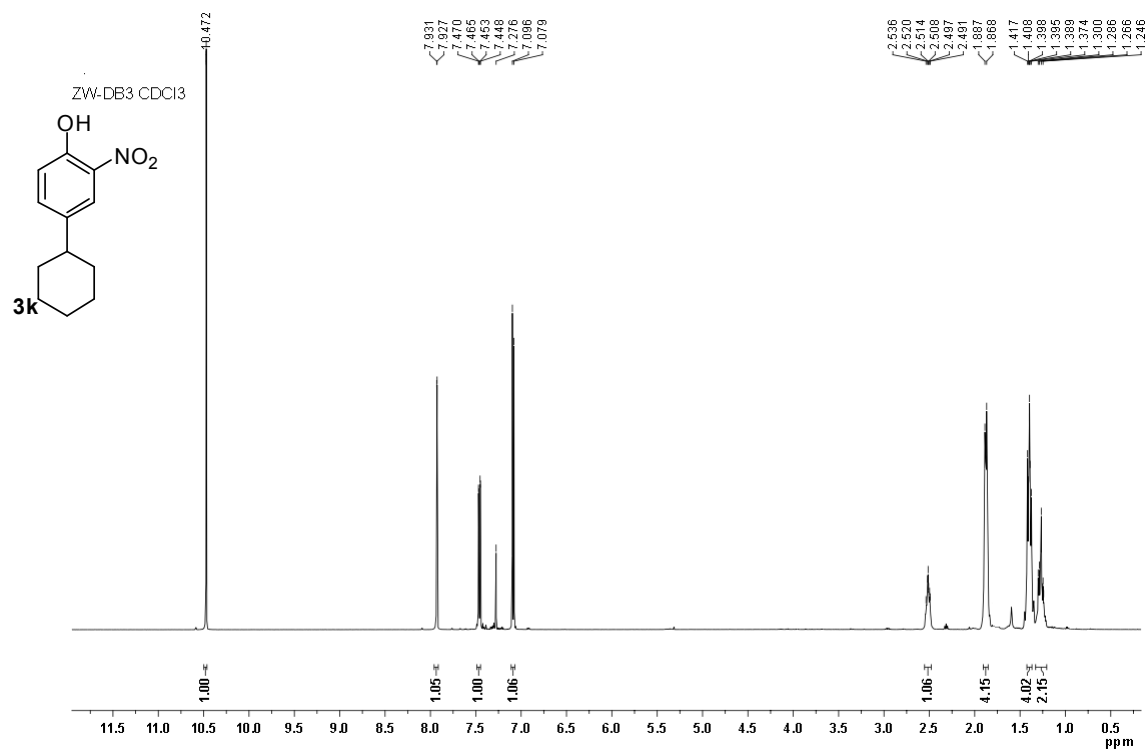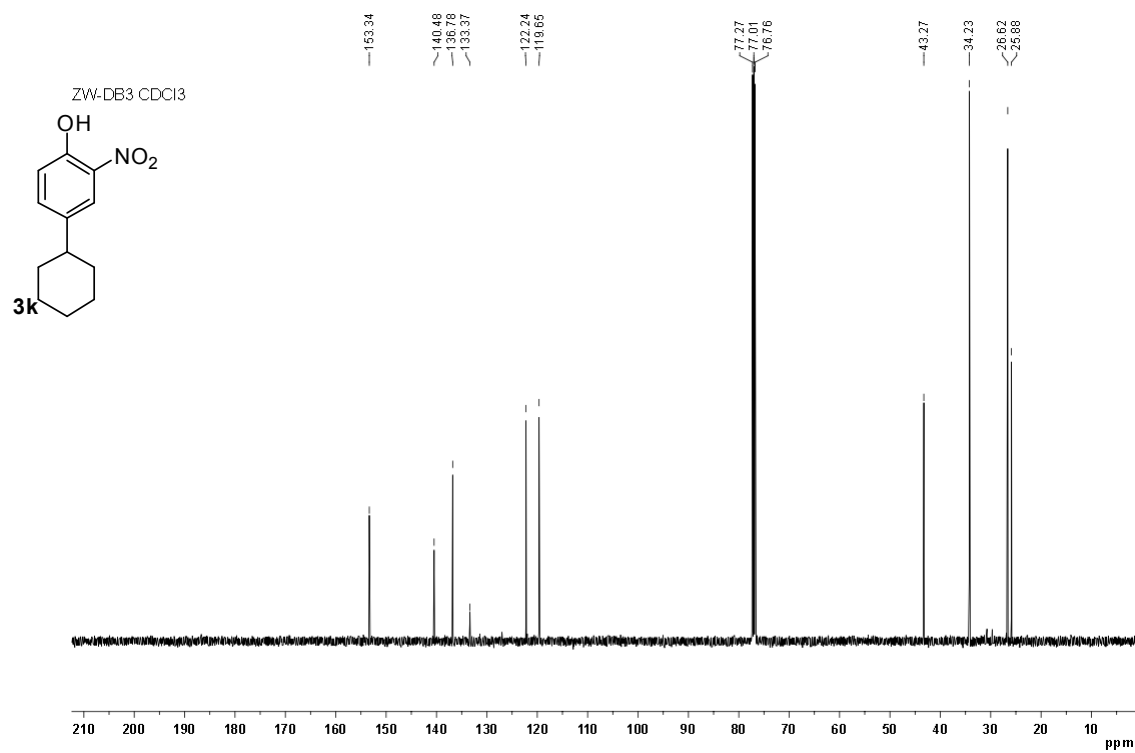

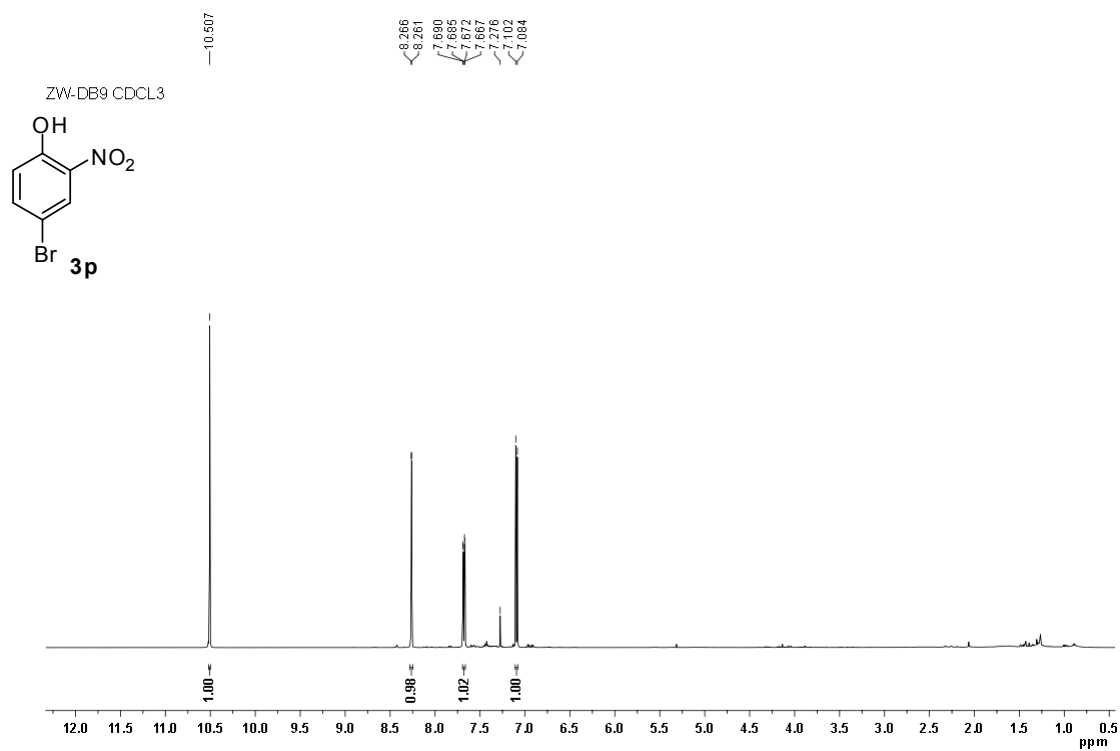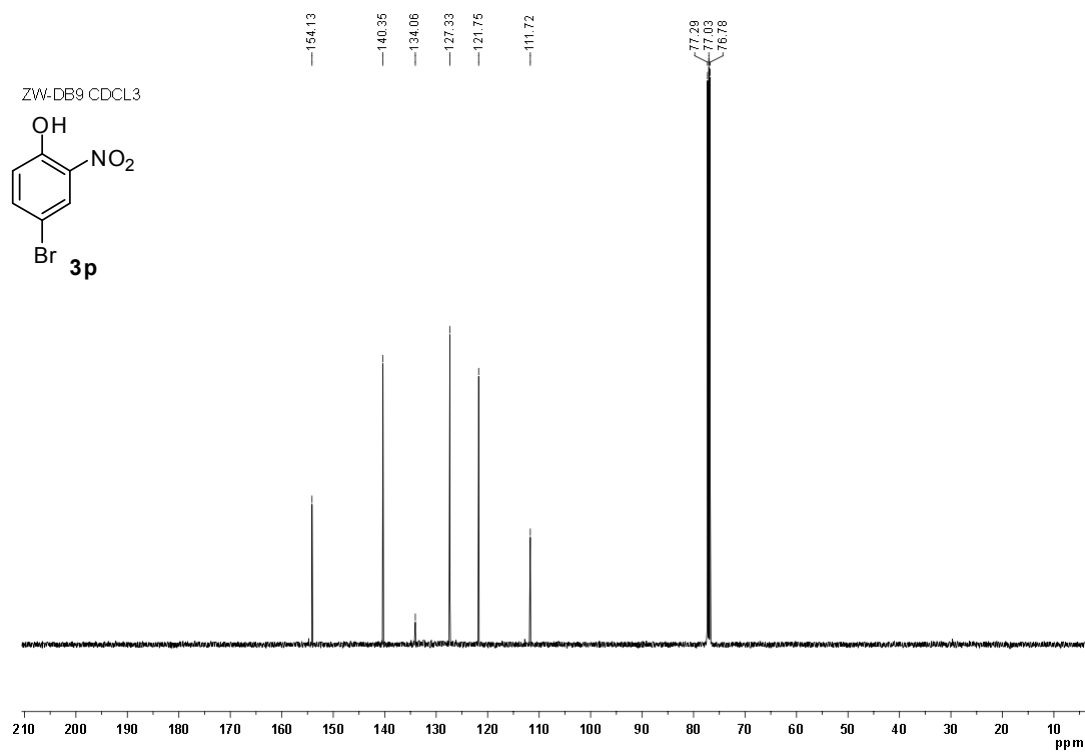

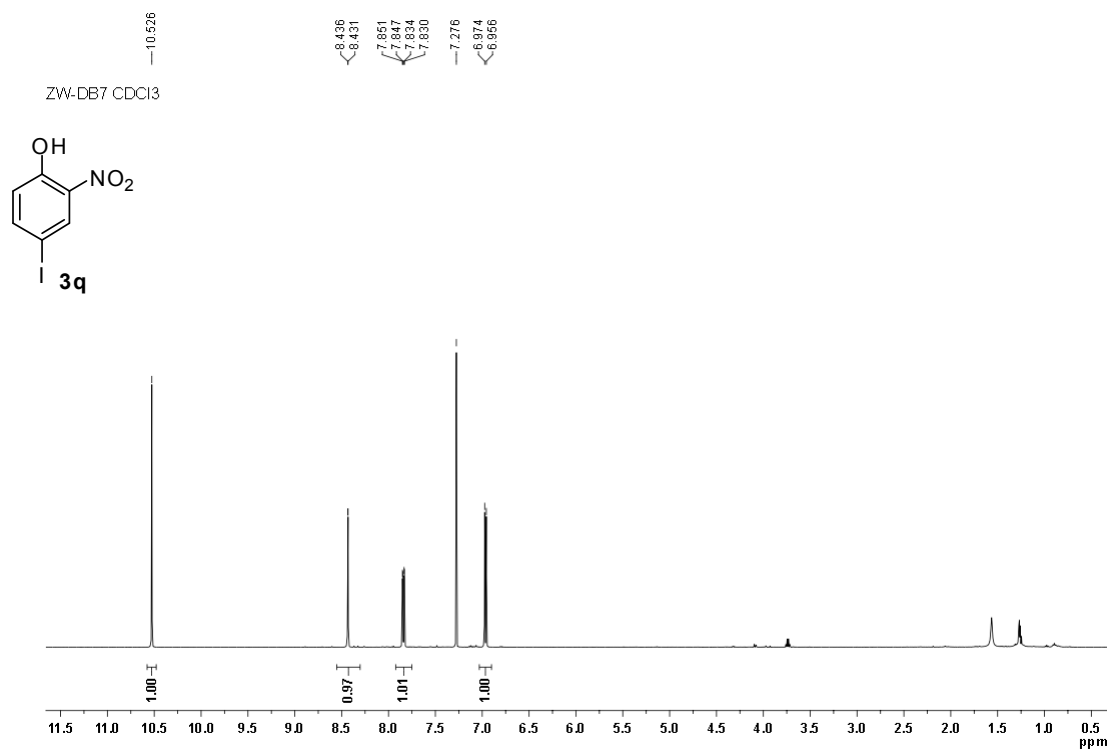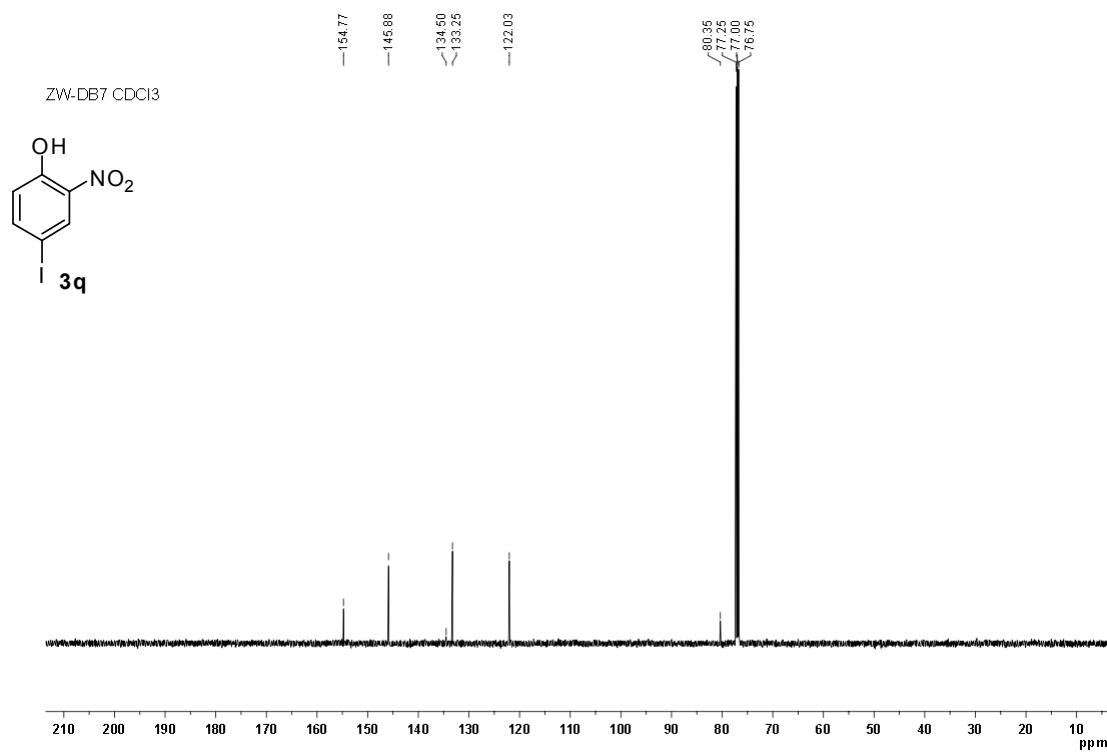

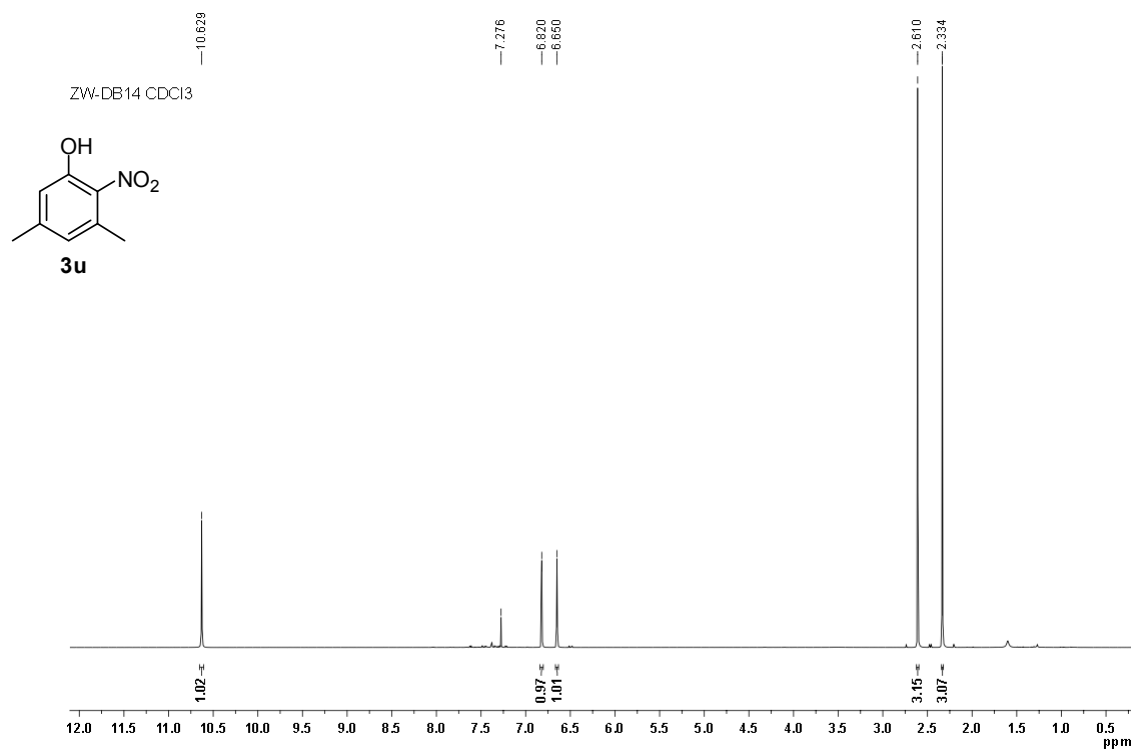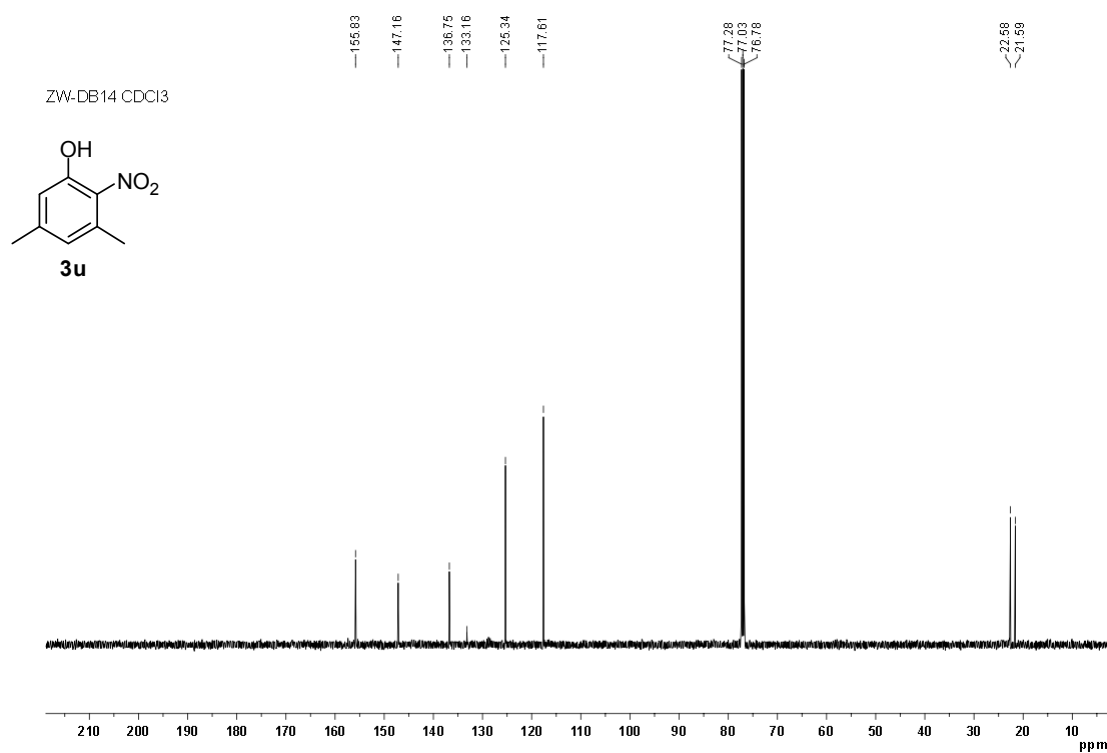

### 3. <sup>1</sup>H NMR Spectrum of 1a-*d*<sub>5</sub>

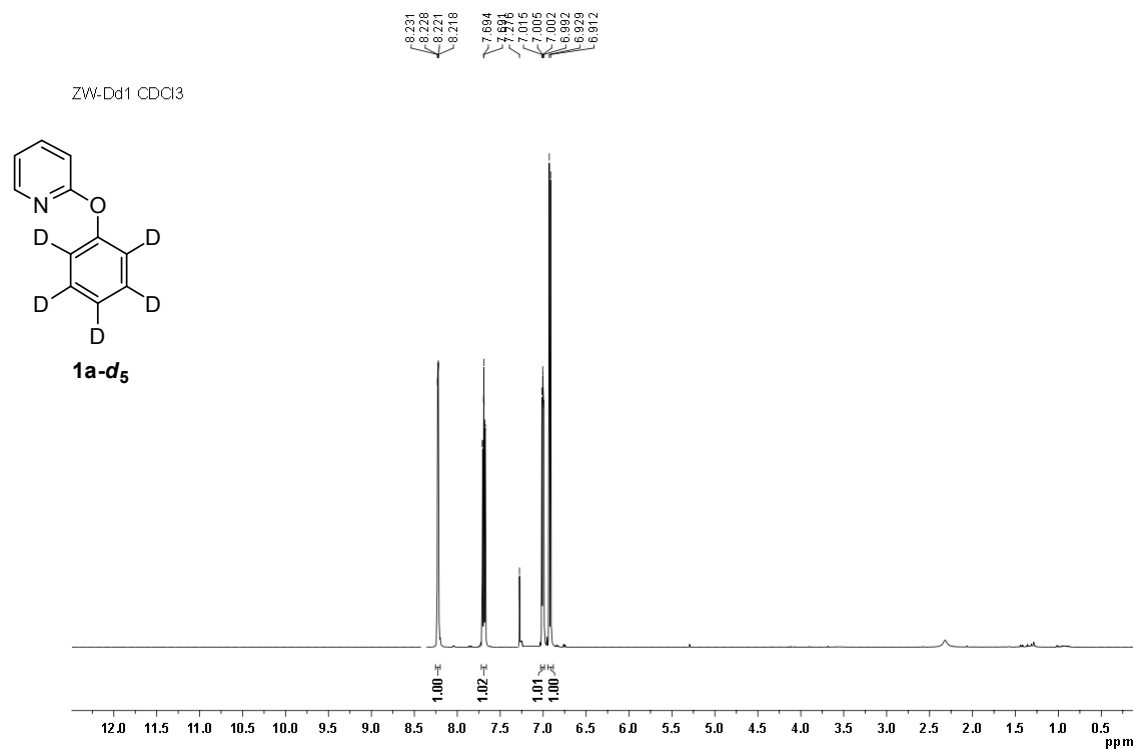

#### 4. <sup>1</sup>H NMR Spectrum of 2a and 2a-d<sub>4</sub> Mixture for KIE Calculation

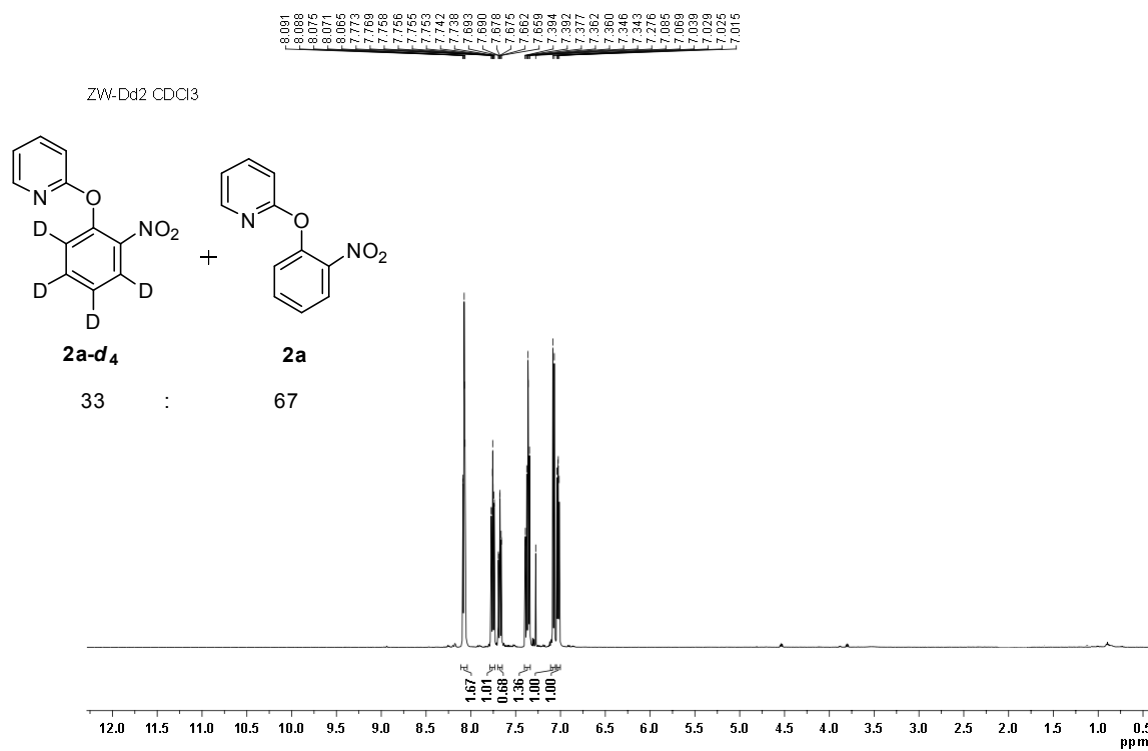

Supplement: Supplementary file 1 [file 3864001]
